# COstrained Reference frame diffusion TEensor Correlation Spectroscopic (CORTECS) MRI: A practical framework for high-resolution diffusion tensor distribution imaging

Alexandru V. Avram<sup>1,2,3,\*</sup>, Kadharbatcha S. Saleem<sup>1,2,3</sup>, Peter J. Basser<sup>1</sup>

**1 Eunice Kennedy Shriver National Institute of Child Health and Human Development, National Institutes of Health, Bethesda, Maryland, USA**

**2 Center for Neuroscience and Regenerative Medicine, The Henry M. Jackson Foundation for the Advancement of Military Medicine, Bethesda, Maryland, USA**

**3 Henry M. Jackson Foundation for the Advancement of Military Medicine Inc., Bethesda, 20814, Maryland, USA**

\* Corresponding author: [alexandru.avram@nih.gov](mailto:alexandru.avram@nih.gov)

## Abstract

Diffusion MRI studies with resolutions of a few hundred micrometers have consistently shown that in the cortex water diffusion occurs preferentially along radial and tangential orientations with respect to the cortical surface, in agreement with histology. These dominant orientations do not change significantly even if the relative contributions from microscopic water pools to the net voxel signal vary across studies that use different diffusion times, b-values, TEs, and TRs. With this in mind, we propose a practical new framework for measuring non-parametric diffusion tensor distribution (DTD) MRI by constraining the microscopic diffusion tensors of the DTD to be diagonalized using the same orthonormal reference frame of the mesoscopic voxel. In each voxel, the constrained DTD (cDTD) is completely determined by the correlation spectrum of the microscopic principal diffusivities associated with the axes of the voxel reference frame. Consequently, all cDTDs are inherently limited to the domain of positive definite tensors and can be reconstructed efficiently with numerical methods for solving Inverse Laplace Transform problems. Moreover, cDTDs can be measured using only data acquired with conventional single diffusion encoding, which can be obtained more efficiently than measurements with multiple diffusion encoding. In tissues with radial symmetry, such as the cortex, we can further constrain the cDTD to contain only cylindrically symmetric diffusion tensors and measure the 2D correlation spectra of radial and tangential diffusivities. To demonstrate this framework, we perform numerical simulations and analyze high-resolution dMRI data. We image 2D cDTDs in the cortex and derive marginal distributions of radial and tangential diffusivities, distributions of the microscopic fractional anisotropies and mean diffusivities, as well as their 2D correlation spectra to quantify the shape-size characteristics of the microscopic diffusion tensors. Signal components corresponding to specific bands in the measured correlation spectra show high specificity to cortical laminar structures observed with histology. Our framework drastically simplifies the measurement of non-parametric DTDs and may be applied retrospectively to analyze existing high-resolution dMRI data. Moreover, the framework provides a non-parametric generalization of DTI and subsumes existing diffusion

signal representations and tissue models, enabling their harmonization, cross-validation, and optimization in specific clinical applications characterizing tissue changes.

## 1 Introduction

2 By quantifying the microscopic motions of water molecules diffusion MRI (dMRI) provides a sensitive clinical tool to  
3 non-invasively probe the tissue structures at length scales ( $\approx 5\mu m$ ) much smaller than the voxel size. In isotropic and  
4 anisotropic tissues, the dMRI signal at low diffusion sensitizations (b-values) can be described phenomenologically  
5 using diffusion tensor imaging (DTI) [Basser et al., 1994a,b]. In DTI, the diffusion signal attenuation in each voxel is  
6 modeled using a diffusion tensor,  $\mathbf{D}$ , which has 6 degrees of freedom. The diffusion tensor can be decomposed or  
7 diagonalized in an orthogonal reference frame whose principal coordinate axes are characterized by the eigenvectors  
8  $\epsilon_1, \epsilon_2, \epsilon_3$ . The normalized orthogonal unit vectors along the principal tensor axes represent 3 degrees of freedom of  $\mathbf{D}$   
9 that define its orientation with respect to the laboratory reference frame. The scalar principal diffusivities  $\lambda_1, \lambda_2, \lambda_3$   
10 corresponding to these directions represent the other 3 degrees of freedom of  $\mathbf{D}$  and determine the mean diffusivity  
11 and diffusion anisotropy. In general,  $\mathbf{D}$  can be written as:

$$\mathbf{D} = \lambda_1 \epsilon_1 \epsilon_1^T + \lambda_2 \epsilon_2 \epsilon_2^T + \lambda_3 \epsilon_3 \epsilon_3^T \quad (1)$$

12 , where  $\epsilon_1 \epsilon_1^T, \epsilon_2 \epsilon_2^T, \epsilon_3 \epsilon_3^T$  are the principal coordinate axes dyads (or rank-1 tensors) derived from the  
13 eigenvectors of the diffusion tensor while the positivity of the principal diffusivities (i.e., eigenvalues of  $\mathbf{D}$ ) guarantees  
14 that  $\mathbf{D}$  is positive definite.

15 However, at b-values larger than  $1500s/mm^2$  the dMRI tissue signal is more sensitive to the intravoxel  
16 variation of water diffusion properties, and the DTI approximation may no longer hold. To quantify the intravoxel  
17 diffusion heterogeneity many approaches have been proposed, including using signal representations with higher-order  
18 terms, such as diffusion kurtosis imaging (DKI) [Jensen et al., 2005], generalized diffusion tensor imaging (GDTI)  
19 [Liu et al., 2004, Özarslan and Mareci, 2003], mean apparent propagator (MAP) MRI [Avram et al., 2016, Özarslan  
20 et al., 2013], as well as multi-exponential, multi-tensor, or multi-compartment tissue diffusion models [Assaf and  
21 Basser, 2005, Mulkern et al., 1999, Stanisz et al., 1997, Zhang et al., 2012].

22 Jian et al., extended the multi-tensor signal representations to describe intravoxel diffusion heterogeneity using  
23 a Wishart distribution of microscopic diffusion tensors [Jian et al., 2007]. Even though this parametric distribution is  
24 limited in its ability to accurately quantify the range of diffusion heterogeneity in healthy and diseased tissues, it  
25 nonetheless inspired great interest in measuring the underlying distribution of microscopic diffusion tensors (DTDs).  
26 In general, however, to disentangle microscopic processes with arbitrary diffusivities, diffusion anisotropies, and  
27 orientations, it is necessary to sensitize the measurement to diffusion-diffusion correlations [Callaghan and Komlosh,  
28 2002, Cory et al., 1990, Mitra, 1995] by preparing the signal with multiple pulsed-field gradient (mPFG), or multiple  
29 diffusion encodings (MDE). Historically, biological and clinical applications of mPFG or MDE methods [Komlosh  
30 et al., 2007] have focused on estimating microstructural parameters such as the average axon diameters [Avram et al.,  
31 2013a,b, Koch and Finsterbusch, 2008, Komlosh et al., 2018] or pore size distributions [Benjamini et al., 2016]. More  
32 recently, MDE-prepared MRI measurements were described using tensor-valued diffusion encoding [Topgaard, 2017,  
33 Westin et al., 2016] in the context of probing diffusion heterogeneity in voxels composed of multiple non-exchanging  
34 Gaussian diffusion processes described with diffusion tensors whose corresponding ellipsoids have distinct sizes,  
35 shapes, and orientations, i.e., the DTD.

36 While, at least in principle, one can reconstruct DTDs from a very large number of measurements with  
37 encodings sampling the 6D space of b-tensors, in practice, the limited signal-to-noise ratio (SNR) and long scan  
38 duration make such clinical or biological experiments very challenging [Song et al., 2022, Topgaard, 2017]. To reduce  
39 the requirements for the high SNR level and a large number of measurement encodings some have made simplifying  
40 assumptions such as cylindrical symmetry of microscopic tensors [Topgaard, 2017] which reduce the dimensionality of  
41 non-parametric DTD reconstructions from six to four degrees of freedom. Alternatively, one can use parametric  
42 models (e.g., analytical functions) to estimate features of the DTDs [Jian et al., 2007, Magdoo et al., 2021,  
43 Szczepankiewicz et al., 2016, Westin et al., 2016] from data acquired using MDE and conventional single diffusion  
44 encoding (SDE) [Stejskal and Tanner, 1965].

45 Meanwhile, numerous studies using dMRI and other modalities provide converging evidence that, at a  
46 sufficiently small (i.e., mesoscopic) length scale, neuronal tissues, including cortical gray matter (GM) are organized  
47 preferentially along local orthogonal frames of reference. Ever since the earliest observations of cortical cyto- and  
48 myeloarchitecture [Brodman, 1909, Cajal, 1909, Vogt, 1910], histochemistry and immunohistochemistry studies have  
49 consistently shown that cellular and subcellular structures at the microscopic scale are oriented predominantly along  
50 orthogonal, i.e., radial and tangential, orientations with respect to the cortical surface. This orthogonal reference  
51 frame persists at larger, mesoscopic scales of tens and hundreds of micrometers, and can be clearly seen in the  
52 arrangements of cells with various sizes, shapes and densities forming tissue architectural patterns along the same  
53 radial and tangential orientations such as cortical columns and laminae, respectively [Amunts and Zilles, 2015,  
54 Rubenstein and Rakic, 2020]. Most recently, studies using state-of-the-art electron microscopy (EM) in cortical GM  
55 [Lichtman and Denk, 2011, Shapson-Coe et al., 2021] have mapped the 3D organization of neuronal cells in gray  
56 matter with nanometer resolution over fields-of-view (FOVs) of hundreds of micrometers. These studies revealed in  
57 unprecedented detail anisotropic tissue structures, such as the microvasculature [Zhang et al., 2015], branching  
58 dendrites, neurofilaments, and other cell processes in various neuronal and non-neuronal cells (pyramidal neurons,  
59 intrinsic neurons, glial cells, etc.) roughly aligned along a local orthogonal frame of reference.

60 At mesoscopic length scales of a few hundred micrometers, diffusion processes in neural tissues align closely  
61 with the dominant orientations in the local tissue microstructure. Histological validation studies using ultra  
62 high-resolution dMRI have consistently found a good correspondence between the orientations of the underlying tissue  
63 microstructure and the orthogonal DTI reference frame [Budde and Annese, 2013, Seehaus et al., 2013, 2015] defined  
64 by  $\epsilon_1\epsilon_1^T, \epsilon_2\epsilon_2^T, \epsilon_3\epsilon_3^T$ , or the fiber orientation distribution functions (FOD) [Tournier et al., 2004] measured with  
65 high-angular resolution diffusion MRI (HARDI) [Tuch et al., 2002] in the brain [Leergaard et al., 2010]. Numerous  
66 dMRI studies of cortical microstructure in fixed tissues [Aggarwal et al., 2015, Dyrby et al., 2011, Kleinnijenhuis et al.,  
67 2013, Leuze et al., 2014, McNab et al., 2009, 2013, Miller et al., 2011] and *in vivo* [Gulban et al., 2018, Heidemann  
68 et al., 2010, Jaermann et al., 2008, Kleinnijenhuis et al., 2015, McNab et al., 2013, Wang et al., 2021], for review see  
69 [Assaf, 2019], suggest that at submillimeter spatial resolution diffusion in the cortex is anisotropic and varies with the  
70 cortical folding geometry [Cottaar et al., 2018], in good agreement in with the cortical cyto- and myeloarchitectonic  
71 features observed with histology and other modalities [Nieuwenhuys, 2013]. Moreover, HARDI-derived FODs show  
72 preferentially radial and tangential components [Aggarwal et al., 2015, Kleinnijenhuis et al., 2013, Leuze et al., 2014]  
73 which evoke cortical columns [Petersen, 2007, Yacoub et al., 2008] and layers [Bastiani et al., 2016, Nagy et al., 2013],  
74 respectively, that can be observed with post-mortem histological staining. In addition, studies of laminar specific  
75 intra-cortical connectivity measured with diffusion fiber microtractography [Leuze et al., 2014] of cortical FODs  
76 [Aggarwal et al., 2015, Gulban et al., 2018] suggest a similar orthogonal (radial and tangential) organization.

77 Increasing the spatial resolution in dMRI reduces the intravoxel angular dispersion of subvoxel diffusion

78 processes and implicitly the orientational variance of the DTD. At submillimeter spatial resolution, dMRI is sensitive  
79 to cortical diffusion anisotropy and allows us to identify the radial and tangential orientations along which diffusion  
80 processes align. Recently, a careful survey of the high-resolution dMRI literature [Assaf, 2019] suggests that when  
81 different contrast preparations are used to vary the relative contributions of microscopic tissue water pools to net  
82 voxel dMRI signal in the cortex, the dominant diffusion orientations, as measured using the DTI eigenvectors or the  
83 directions of FOD peaks, remain unaffected even though the relative diffusivities or FOD amplitudes along these  
84 orientations may change. At mesoscopic spatial resolutions of a few hundred micrometers, the orientational  
85 characteristics of the dMRI signal remain remarkably consistent across experiments with fixed and live cortical  
86 tissues using different T1- and/or T2-weightings, i.e., different echo time (TE), repetition time (TR), or inversion  
87 time (TI), diffusion sensitizations (b-values) or diffusion/mixing times. These findings imply that at mesoscopic  
88 spatial resolutions, subvoxel cortical diffusion tensors from microscopic water pools are coincident along the same  
89 dominant (radial and tangential) orientations and may have potentially different diffusion anisotropies and  
90 diffusivities. Implicitly, the DTD is predominantly determined by the variations in the shapes (diffusion anisotropies)  
91 and sizes (diffusivities) of the microscopic diffusion tensors, rather than by their relative orientations.

92 In this study, we describe a new framework that simplifies the measurement and analysis of diffusion  
93 heterogeneity in microscopic water pools within gray matter using a non-parametric DTD. Specifically, if the voxel  
94 size is small enough compared to the curvature of the cortex, we can constrain all the microscopic (subvoxel) diffusion  
95 tensors to share the same principal reference frame determined, for instance, by the dyadic of the principal diffusion  
96 eigenvectors,  $\epsilon_1, \epsilon_2, \epsilon_3$ , measured with DTI. With this constraint, the DTD is completely characterized by the voxel  
97 reference frame  $\epsilon_1\epsilon_1^T, \epsilon_2\epsilon_2^T, \epsilon_3\epsilon_3^T$ , and by the 3D joint distribution of corresponding subvoxel principal diffusivities,  
98  $\lambda_1, \lambda_2, \lambda_3$ , which are random variables. This joint probability distribution can be estimated with a 3D Inverse  
99 Laplace Transform analysis using only single diffusion encoded (SDE) MR measurements. This practical,  
100 non-parametric framework for mapping DTDs, called CONstrained Reference frame diffusion TENSOR Spectroscopic  
101 (CORTECS) MRI, could quantify a wide range of cortical diffusion heterogeneity in healthy or diseased brains.

## 102 Methods

### 103 Higher spatial resolution reduces the intravoxel orientational dispersion

104 The net diffusion signal in an imaging voxel containing complex tissue microstructure can be described generally  
105 using an ensemble of subvoxel (i.e., microscopic) diffusion tensors with different sizes, shapes, and orientations,  
106 assumed to be in slow exchange, i.e., the diffusion tensor distribution (DTD). Ordinarily, we can quantify DTDs by  
107 analyzing diffusion-weighted images (DWIs) acquired with multidimensional diffusion encoding (MDE) [Magdoom  
108 et al., 2021, Topgaard, 2017, Westin et al., 2016]. The net dMRI voxel signal,  $S$ , is a function of the tensor-valued  
109 encoding variable called the b-tensor,  $\mathbf{b}$ , computed by integrating the time-dependent diffusion gradient waveforms  
110 amplitudes, and is related to the underlying DTD,  $p(\mathbf{D})$ :

$$S(\mathbf{b}) = \int_{\mathcal{M}_+} p(\mathbf{D}) e^{-\mathbf{b} \cdot \mathbf{D}} d\mathbf{D} \quad (2)$$

111 , where the integral runs over the space or domain of all positive definite matrices,  $\mathcal{M}_+$ . Since the random  
112 variable  $\mathbf{D}$  has 6 degrees of freedom,  $p(\mathbf{D})$  is essentially a 6-dimensional joint probability distribution (or correlation  
113 spectrum) of the diffusion tensor elements. The high dimensionality and the inherent challenge of defining the  
114 subspace of positive-definite random tensor-valued variables,  $\mathbf{D}$ , make solving this problem infeasible in practice, as

no closed-form solution exists. Measuring  $p(\mathbf{D})$  requires a prohibitively large number of measurements with a very high signal-to-noise ratio (SNR) and MDE. Previously, approximations to  $p(\mathbf{D})$  have been proposed either by assuming parametric models and/or by using statistical reconstruction algorithms [Jian et al., 2007, Magdoom et al., 2021, Szczepankiewicz et al., 2016, Topgaard, 2017, Westin et al., 2016].

In cortical GM the orthogonal coordinate axes along which diffusive fluxes align at the microscopic scale of cellular and subcellular structures (i.e., diffusion length scale) are propagated at larger mesoscopic scales guiding the assembly of these structures into orthogonal tissue architectural patterns of cortical laminae and columns [Nieuwenhuys, 2013, Rubenstein and Rakic, 2020]. If the voxel size of dMRI data is significantly smaller than the minimum radius of the curvature of the underlying anatomy (i.e., cortical folding) the orientational variance of subvoxel (microscopic) diffusion processes can be neglected (Fig. 1). Microscopic diffusion processes are coincident with the axes of the local microstructural reference frame determined by the cortical cyto- and myeloarchitecture. For a continuously varying cortical anatomy with a minimum radius of curvature,  $R$ , the range of orientational misalignment between the microscopic diffusion tensors and the voxel reference frame,  $\pm\theta_{max}$ , in a cubic voxel of side length,  $x$ , is:

$$\theta_{max} = \tan^{-1} \left( \frac{x\sqrt{3}}{2R} \right) \quad (3)$$

Fig. 1B shows that  $\theta_{max}$  decreases rapidly at low spatial resolutions,  $\frac{R}{x}$ , but changes slowly at higher values of  $\frac{R}{x}$  (Fig. 1B). At a spatial resolution of a few hundred micrometers the voxel size is much smaller than the cortical radius of curvature ( $R=5\text{mm}$ ) leading to very small values of  $\theta_{max}$ . Under these circumstances, it is reasonable and practical to constrain all diffusion tensor processes in microscopic water pools throughout the voxel (i.e., the DTD) to be described using the same local orthogonal reference frame.

## CONstrained Reference frame diffusion TENSOR Correlation Spectroscopic (CORTECS) MRI

Fixing the local reference frame for all subvoxel tensors has several surprising advantages. First, it significantly reduces the dimensionality of  $p(\mathbf{D})$  and decouples the statistical random variables needed to describe  $p(\mathbf{D})$ . Specifically, the 6D vector/tensor random variable,  $\mathbf{D}$ , corresponding to the 6 components (or degrees of freedom) needed to describe the general DTD is reduced to a 3D random variable comprising the three principal diffusivities,  $\lambda_1, \lambda_2, \lambda_3$  along the axes of the fixed voxel frame of reference,  $\epsilon_1\epsilon_1^T, \epsilon_2\epsilon_2^T, \epsilon_3\epsilon_3^T$ , respectively, which are sufficient to describe the constrained DTDs (cDTDs) within the Coordinate Reference frame diffusion Tensor Correlation Spectroscopic (CORTECS) MRI framework (Fig. 2A,B). Using the eigenvalue decomposition of the diffusion tensor (Eq. 1) we can re-write Eq. 2 as a more tractable 3D Inverse Laplace transform (ILT) problem:

$$S(\mathbf{b}) = \int_0^\infty \int_0^\infty \int_0^\infty p(\lambda_1, \lambda_2, \lambda_3) e^{-\lambda_1\epsilon_1^T\mathbf{b}\epsilon_1 - \lambda_2\epsilon_2^T\mathbf{b}\epsilon_2 - \lambda_3\epsilon_3^T\mathbf{b}\epsilon_3} d\lambda_1 d\lambda_2 d\lambda_3 \quad (4)$$

, where  $\epsilon_i^T\mathbf{b}\epsilon_i$  is a non-negative scalar weighting (quadratic form) that represents the reciprocal Laplace variable corresponding to  $\lambda_i$ . Besides the drastic reduction in the computational complexity due to the dimensionality reduction, the CORTECS framework inherently enforces positive definiteness of diffusion tensors by requiring positivity of the  $\lambda_i$ .

Another very important advantage of constraining the reference frames of the DTD tensor random variable is

149 that we can measure  $p(\lambda_1, \lambda_2, \lambda_3)$  using only DWIs with single pulse-field gradient (sPFG) or single diffusion  
 150 encoding (SDE), a.k.a. linear tensor encoding with rank-1 b-tensors. For a conventional SDE DWI with an arbitrary  
 151 b-value,  $b$ , and diffusion gradient direction given by the unit vector  $\mathbf{g} = [g_x, g_y, g_z]^T$ , the encoding b-tensor has  
 152 rank-1,  $\mathbf{b} = b\mathbf{g}\mathbf{g}^T$ . We can rewrite the signal equation above with respect to the components of  $\mathbf{g}$  expressed in the  
 153 voxel frame of reference,  $\mathbf{g}' = [g'_1, g'_2, g'_3]^T = [\epsilon_1\epsilon_2\epsilon_3] \mathbf{g}$ :

$$S(\mathbf{b}) = \int_0^\infty \int_0^\infty \int_0^\infty p(\lambda_1, \lambda_2, \lambda_3) e^{-\lambda_1 b g'^2_1} e^{-\lambda_2 b g'^2_2} e^{-\lambda_3 b g'^2_3} d\lambda_1 d\lambda_2 d\lambda_3 \quad (5)$$

154 The factors  $b g'^2_i$  are the non-negative weighting parameters of the principal diffusivities,  $\lambda_i$ , in the Laplace  
 155 Transform representation of the signal. We can generate a wide range of joint weighting parameters  $b g'^2_i$  by varying  
 156 the b-value and diffusion gradient orientations in conventional SDE preparations. Subsequently, from multiple SDE  
 157 DWIs we can estimate, in each voxel, the correlation spectrum of principal diffusivities,  $p(\lambda_1, \lambda_2, \lambda_3)$  which quantifies  
 158 the properties of all microscopic diffusion tensor processes. Compared to MDE-DWIs, the conventional SDE-DWI  
 159 can be acquired efficiently using product single pulsed-field gradient (sPFG) spin-echo (SE) diffusion MR sequences  
 160 [Stejskal and Tanner, 1965] available on all microimaging and clinical MRI scanners. In general, SDE-DWIs can  
 161 achieve higher b-values, shorter echo times (TEs), higher spatial resolution, and/or better SNR than MDE-DWIs  
 162 using double or triple diffusion encoding. Moreover, the spectral reconstruction of  $p(\lambda_1, \lambda_2, \lambda_3)$ , henceforth referred to  
 163 as 3D cDTD, does not require statistical methods to enforce positive definiteness but can still benefit from various  
 164 techniques that may be used to solve ILT-like problems, such as  $L_2$ - or  $L_1$ -norm regularization, compressed sensing  
 165 [Bai et al., 2015], or constrained optimization [Benjamini et al., 2016], etc.

166 If the underlying microstructure is radially symmetric, i.e., varying along a single preferred orientation, we can  
 167 make an additional simplification to the problem and assume locally oriented cylindrical symmetry for each ensemble  
 168 of subvoxel diffusion tensors (Fig. 2F,G,H). In this case, the voxel reference frame is determined by a single  
 169 orientation,  $\epsilon_1\epsilon_1^T$ , i.e., the radial direction, which implicitly defines the orthogonal, tangential component described  
 170 by the rank-2 tensor  $\epsilon_2\epsilon_2^T + \epsilon_3\epsilon_3^T = \mathcal{I}_3 - \epsilon_1\epsilon_1^T$ , where  $\mathcal{I}_3$  is the 3x3 identity matrix. We can relate the signal in a  
 171 voxel with fixed principal axis  $\epsilon_1\epsilon_1^T$  to a two-dimensional correlation spectrum of radial and tangential diffusivities,  
 172  $p(\lambda_r, \lambda_t)$  that completely determines the corresponding cylindrically symmetric DTD:

$$S(\mathbf{b}) = \int_0^\infty \int_0^\infty p(\lambda_r, \lambda_t) e^{-\lambda_r b \cos^2 \phi_{\mathbf{g}}} e^{-\lambda_t b \sin^2 \phi_{\mathbf{g}}} d\lambda_r d\lambda_t \quad (6)$$

173 The parameter  $\phi_{\mathbf{g}} = \arccos(\epsilon_1^T \mathbf{g})$  represents the angle between the applied gradient direction,  $\mathbf{g}$ , and the  
 174 radial direction of the underlying reference frame,  $\epsilon_1\epsilon_1^T$ . In radially symmetric tissues such as the cortex with  
 175 cytoarchitecture aligned along a dominant radial direction (columns) and the corresponding tangential plane  
 176 (laminae), diffusion processes are likely oriented and cylindrically symmetric and can be more economically and  
 177 effectively quantified using this lower-dimensional correlation spectrum, called 2D cDTD.

178 Lastly, in a final simplifying step, if all subvoxel diffusion processes are isotropic, the correlation spectrum of  
 179 diffusion tensor eigenvalues reduces to a distribution of a single scalar diffusivity random variable,  $\lambda_0$ , which can be  
 180 viewed as 1D cDTD:

$$S(\mathbf{b}) = \int_0^\infty p(\lambda_0) e^{-\lambda_0 b} d\lambda_0 \quad (7)$$

181 As an aside, we should point out an important connection between 1D cDTD MRI and our previously  
 182 proposed methods for one- and multidimensional MD spectroscopic MRI using isotropic diffusion encoding (IDE)

183 [Avram et al., 2019, 2021]. Mapping non-parametric spectra of MD values in microscopic tissue water pools using  
184 multiple IDE measurements does not require that diffusion in these pools is isotropic. Meanwhile, the 1D cDTD MRI  
185 spectral reconstruction using Eq. 7 correctly quantifies the spectra of water mobilities only if all diffusion processes  
186 within the voxel are isotropic, in which case the two methods will provide congruent results.

## 187 Mapping distributions and correlation spectra of microscopic fractional anisotropy and 188 mean diffusivity

189 From the measured cDTD within each voxel, we can compute non-parametric distributions and correlation spectra of  
190 DTI-derived parameters of microscopic diffusion tensors, such as fractional anisotropy (FA) or mean diffusivity (MD).  
191 Specifically, we can define a new random variable,  $\alpha$ , that quantifies the FA of each microscopic diffusion tensor in  
192 the cDTD:

$$\alpha = \sqrt{\frac{1}{2} \frac{\sqrt{(\lambda_1 - \lambda_2)^2 + (\lambda_2 - \lambda_3)^2 + (\lambda_3 - \lambda_1)^2}}{\sqrt{\lambda_1^2 + \lambda_2^2 + \lambda_3^2}}} \quad (8)$$

193 From  $p(\lambda_1, \lambda_2, \lambda_3)$  we can then derive the probability density function (one-dimensional spectrum) of the  
194 microscopic tensor FAs,  $p_{FA}(\alpha)$ , which quantifies the cDTD shape heterogeneity non-parametrically. The statistical  
195 moments of the  $p_{FA}(\alpha)$  provide important microstructural parameters, such as the microscopic anisotropy,  $\mu FA$ ,  
196 computed as the mean of  $p_{FA}(\alpha)$ . Similarly, we can define a new cDTD-derived random variable that quantifies the  
197 mean diffusivity of each microscopic tensor,  $\mu = (\lambda_1 + \lambda_2 + \lambda_3)/3$ , and compute the probability density function  
198  $p_{MD}(\mu)$  to describe the spectrum the microscopic water mobilities in tissue non-parametrically.

199 Finally, from  $p(\lambda_1, \lambda_2, \lambda_3)$  we can also compute non-parametric multidimensional correlation spectra of two or  
200 more microscopic DTI metrics. For example, we can quantify non-parametrically the correlations between the shapes  
201 and sizes of the diffusion ellipsoids corresponding to the underlying diffusion tensors by computing the joint  
202 probability density function of the two random variables  $\alpha$  and  $\mu$ ,  $p_{FA-MD}(\alpha, \mu)$ . This practical and efficient  
203 decomposition of tissue heterogeneity based on diffusion anisotropy and mean diffusivity correlations in microscopic  
204 water pools may reveal specific microstructural motifs or patterns potentially relevant to many clinical applications.

## 205 A generalization of various diffusion tensor signal models

206 The CORTECS framework can describe a wide range of heterogeneous diffusion processes in healthy and diseased  
207 tissues and subsumes several diffusion tensor signal models. For example, if we constrain  
208  $p(\lambda_1, \lambda_2, \lambda_3) = \delta(\lambda_1 - \lambda'_1, \lambda_2 - \lambda'_2, \lambda_3 - \lambda'_3)$ , 3D cDTD simplifies to conventional DTI with the three mean  
209 eigenvalues  $\lambda'_1, \lambda'_2, \lambda'_3$ . In this way, 3D cDTD can be viewed as a generalization of high-resolution DTI that  
210 quantifies intravoxel diffusion heterogeneity as a non-parametric correlation spectrum of the principal diffusivities in  
211 microscopic water pools. To describe multi-exponential or multi-tensor signal decays in heterogeneous tissues [Avram  
212 et al., 2020, Mulkern et al., 1999, Stanisiz et al., 1997] we can assume that  $p(\lambda_1, \lambda_2, \lambda_3)$  can be represented as a sum of  
213 delta functions (point masses) [Avram et al., 2020]. Moreover, the spectroscopic decomposition of the net voxel signal  
214 in cDTD makes it easy to disentangle partial volume contributions, such as those from cerebrospinal fluid (CSF), or  
215 free water in tissues caused by edema or other processes [Pasternak et al., 2009].

## 216 Monte Carlo Simulations

217 We conducted Monte Carlo (MC) simulations to evaluate the numerical stability and accuracy of the voxel-wise  
218 estimation of 3D and 2D cDTDs from noisy data. Specifically, starting from ground truth DTDs constrained with  
219 fixed voxel reference frames (2D and 3D cDTDs), defined analytically using multidimensional lognormal distributions,  
220 respectively, we computed the dMRI signals expected from an experiment using conventional single-diffusion encoded  
221 (SDE) DWI measurements with the same gradient orientations and b-values as in our fixed-brain experiment  
222 described below. Next, from these ground truth signals, we generated 500 instances of noisy measurements by adding  
223 Rician noise to simulate real measurements with different SNR levels. From each set of noisy measurements, we  
224 computed the corresponding normalized 3D correlation spectra of principal diffusivities, or normalized 2D correlation  
225 spectra of radial and tangential diffusivities and compared the statistics of these spectra (mean and standard  
226 deviation) to the corresponding ground truth 3D and 2D DTDs, respectively.

## 227 Ultra high-resolution dMRI of a fixed macaque monkey brain

228 The brain of a healthy young adult rhesus macaque monkey (*Macaca mulatta*) weighing 13.55 kg was prepared using  
229 a well-controlled perfusion fixation process, as described in [Saleem et al., 2021]. In brief, the animal was deeply  
230 anesthetized with sodium pentobarbital and perfused transcardially with heparinized saline, followed by 4%  
231 paraformaldehyde in 0.1 M phosphate buffer (pH 7.4). After perfusion, the brain was removed from the cranium and  
232 post-fixed for 8h in the same buffered paraformaldehyde solution. Following the post-fixation, the brain was  
233 transferred into 0.1 M phosphate-buffered saline with sodium azide before the MRI data acquisition. All procedures  
234 were carried out under a protocol approved by the Institutional Animal Care and Use Committee of the National  
235 Institute of Mental Health (NIMH) and the National Institute of Health (NIH) and adhered to the Guide for the  
236 Care and Use of Laboratory Animals (National Research Council).

237 Based on a preliminary structural MRI scan of the specimen, we fabricated a three-dimensional (3D) brain  
238 mold inside a cylindrical acrylic plastic container. The specimen was positioned inside the brain mold which was  
239 placed inside a custom 70mm cylindrical container. The container was filled with Fomblin and gently stirred under a  
240 vacuum for 4 hours to remove air bubbles. Subsequently, the container was sealed and prepared for MR imaging  
241 using a Bruker 7T horizontal-bore MRI scanner and a Bruker 72mm quadrature RF coil.

242 We acquired whole-brain diffusion-weighted images (DWIs) with a cubic voxel size of 200 $\mu$ m, i.e., a  
243 375x320x230 imaging matrix on a 7.5x6.4x4.6cm field-of-view (FOV), using a diffusion spin-echo 3D echo-planar  
244 imaging (EPI) sequence with 50ms echo time (TE), 650ms repetition time (TR), 18 segments and 1.33 partial Fourier  
245 acceleration. We obtained a total of 112 DWIs using multiple b-value shells (100, 1000, 2500, 4500, 7000, and 10000  
246  $s/mm^2$ ) with diffusion-encoding gradient orientations (3, 9, 15, 21, 28, and 36, respectively) uniformly sampling the  
247 unit sphere on each b-value shell and across shells. The diffusion gradient pulse durations and separations were  $\delta=6$ ms  
248 and  $\Delta=28$ ms, respectively. Each DWI volume was acquired using a single average in 52 minutes. The total duration  
249 of the diffusion MRI scan was 93 hours and 20 minutes. We processed all whole-brain high-resolution DWIs with the  
250 TORTOISE software pipeline [Pierpaoli et al., 2010] which includes image registration, Gibbs ringing correction  
251 [Kellner et al., 2016], denoising [Veraart et al., 2016], corrections for EPI distortion including eddy currents and B0  
252 inhomogeneities using a high-tissue contrast structural magnetization transfer (MT) scan as an anatomical template.



## 253 **Histological processing**

254 After imaging, the perfusion-fixed brain specimen was prepared for histological processing with five different stains as  
255 described in [Saleem et al., 2021]. In brief, the brain blocks were frozen and serially sectioned through the entire  
256 brain at 50 $\mu$ m thickness in the coronal plane. Next, five sets of interleaved sections were processed for Parvalbumin  
257 (PV), neurofilament protein (SMI-32), choline acetyltransferase (ChAT), cresyl violet (CV), and Acetylcholinesterase  
258 (AChE) staining. Finally, we captured high-resolution images of stained sections using a Zeiss high-resolution slide  
259 scanner with a 20X objective. These images were then manually aligned with the corresponding slices from the MRI  
260 data for comparison of cortical architectonic features.

## 261 **2D CORTECS MRI in the fixed macaque brain**

262 From the distortion-corrected DWIs we estimated fiber orientation distribution functions and compared their  
263 orientations in the cortex to those of microscopic structures observed on histological images. We further analyzed the  
264 high-resolution DWIs using DTI and estimated the voxel reference frame,  $\epsilon_1\epsilon_1^T, \epsilon_2\epsilon_2^T, \epsilon_3\epsilon_3^T$ , through eigenvalue  
265 decomposition of the net diffusion tensor in each voxel (Eq. 1). Subsequently, using the diffusion principal diffusion  
266 direction  $\epsilon_1\epsilon_1^T$ , we computed the diffusion weightings of radial and tangential processes,  $b \cos^2 \phi_{\mathbf{g}}$  and  $b \sin^2 \phi_{\mathbf{g}}$ ,  
267 respectively, for each measurement encoding and in each voxel. Finally, we estimated a piecewise continuous  
268 approximation of the 2D cDTD correlation spectrum,  $p(\lambda_r, \lambda_t)$ , by numerically solving the 2D ILT problem (Eq. 6)  
269 using linear least-squares error minimization with L2-norm regularization [Hansen, 1992] and positivity constraints. A  
270 detailed description of the implementation of the spectral reconstruction algorithm can be found in [Avram et al.,  
271 2019, 2021]. The spectral bins of the cDTDs reconstruction were defined on a 12 x 12 grid of logarithmically spaced  
272  $\lambda_r$  and  $\lambda_t$  values ranging from 0.01 – 2.00 $\mu$ m<sup>2</sup>/ms. From the 2D cDTD correlation spectrum  $p(\lambda_r, \lambda_t)$  we derived  
273 maps of the marginal distributions of the radial and tangential diffusivities, microscopic FA and MD, as well as the  
274 microscopic FA-MD correlation spectra,  $p_{FA-MD}(\alpha, \mu)$ , and related these results to cortical cytoarchitectonic  
275 features observed with histology. The microscopic FA-MD correlation spectra were estimated numerically from the  
276 cDTDs using an 11 x 11 grid of microscopic FA and MD values. We empirically selected several *ad hoc* spectral  
277 domains in the 2D joint distributions  $p(\lambda_r, \lambda_t)$  and  $p_{FA-MD}(\alpha, \mu)$  to best capture the most prominent  
278 spatial-spectral correlations. We compared maps of the signal components corresponding to these domains to the  
279 cortical cytoarchitectonic features in the corresponding stained tissue section. The cDTD reconstruction and analysis  
280 for the numerical simulations and fixed brain experiments were implemented in MATLAB.

## 281 **Results**

### 282 **Monte Carlo Simulations**

283 Monte Carlo (MC) simulations of 3D and 2D cDTD reconstructions show that it is possible to distinguish subvoxel  
284 diffusion tensor processes that are aligned in the same voxel reference frame based on differences in the correlations of  
285 their principal diffusivities using experimental designs that contain only SDE measurements and can be achieved with  
286 current MRI scanners. Fig. 3 shows the MC results for a ground truth 3D cDTD (i.e., correlation spectrum of  
287 principal diffusivities) that consists of a mixture of three multivariate log-normal distributions, reflecting the presence  
288 of 3 microscopic water pools with distinct diffusion tensor properties. The mean normalized spectra reconstructed  
289 from noisy measurements with various SNR levels provide good estimates for the locations and concentrations (i.e.,

290 areas under the peaks) of individual signal components. Meanwhile, at higher SNR levels, the exact shapes of the  
291 estimated spectral peaks are more accurately resolved. Lower dimensional marginal distributions derived from the 3D  
292 cDTDs also reveal the presence of multiple peaks and show improved accuracy at higher SNR levels. Similar results  
293 were obtained in MC simulations using 2D cDTDs shown in Fig. 4. The ground truth correlation spectrum of radial  
294 and tangential diffusivities,  $p(\lambda_r, \lambda_t)$ , that defines the 2D cDTD consists of a mixture three microscopic diffusion  
295 processes described by mixtures of multivariate log-normal distributions. The locations and concentrations of these  
296 peaks can be estimated over a wide range of SNR levels, with improved accuracy at higher SNRs. Errors in the  
297 estimated spectra may be due to measurement noise, the limited number of measurements, and/or the regularization  
298 and positivity constraints used to improve the condition number of the spectral reconstruction.

299 The spectral resolution depends on the number of measurements with different encodings, the SNR level, and  
300 the use of constraints and regularization for spectral reconstruction. For a fixed SNR and a wide range of signal  
301 weightings (e.g., b-values), slowly decaying components have a better contrast-to-noise ratio (CNR) than fast  
302 decaying ones and can therefore be resolved with higher spectral resolution. The resulting non-uniform spectral  
303 resolution is not unique to CORTECS MRI but is inherent to the data required by all multidimensional relaxation  
304 and diffusion spectroscopic MRI methods. These techniques aim to disentangle multiexponential processes by  
305 quantifying the underlying distribution of decay constants non-parametrically using an ILT-like reconstruction from a  
306 finite set of measurements. The spectral resolution could be improved using more advanced spectral reconstruction  
307 algorithms that rely on statistical methods [Prange and Song, 2009], compressed sensing [Bai et al., 2015], various  
308 constraints [Benjamini and Bassler, 2016], Bayesian estimation [McGivney et al., 2018], or deep learning [Pirk et al.,  
309 2020] to improve spectral resolution.

310 In general, the presence of the fixative and the reduced temperature (room temperature vs. body temperature)  
311 decreases the diffusivities in fixed tissues compared to those observed in the live human brain [Dyrby et al., 2011]. It  
312 is important to note that if we scale all diffusivities by any factor, say 3, and the b-values used in our experiment by  
313 its inverse, i.e., 1/3, all signal attenuations,  $e^{-bD}$ , remain unchanged. Consequently, the Monte Carlo simulations  
314 with different SNR levels obtained using fixed brain diffusivities and this study's experimental design with  
315  $b_{max} = 10,000s/mm^2$  also accurately describe an experiment in which all tissue diffusivities are scaled by a factor of  
316 3 simulating *in vivo* conditions and all b-values are scaled by a factor of 1/3, i.e.,  $b_{max} = 3,333s/mm^2$ , simulating  
317 clinical scan parameters.

## 318 Comparison of dMRI and histological sections

319 Figure 5 shows a multi-scale side-by-side comparison of a coronal section stained with SMI-32 and the corresponding  
320 dMRI data in a representative region of the dorsal premotor cortex. At the macroscopic scale (Fig. 5A,B) we can  
321 clearly see that the dominant diffusion direction in the FOD direction-encoded colored (DEC) image [Dhollander  
322 et al., 2015] (Fig. 5B) varies continuously along the cortical ribbon and remains perpendicular to the cortical surface.  
323 At the mesoscopic scale (Fig. 5C,D) the curvature of the cortex becomes less prominent and the tissue architecture  
324 reveals radially oriented neurofilaments in pyramidal neurons with a staining intensity that varies in a laminar  
325 pattern reflecting distinct cortical layers. The FODs measured with dMRI in the same region (Fig. 5C) show a good  
326 alignment of water diffusion with the dominant orientation of the local microstructure at the scale of hundreds of  
327 micrometers. A careful visual inspection of the SMI-32 section at high magnification (Fig. 5E) reveals the presence of  
328 cell processes oriented radially and tangentially with respect to the cortical surface. The contribution of tangential  
329 processes contributes to the slight differences in SMI-32 staining intensities across cortical layers. At this scale, the  
330 grid-like cortical architecture is clearly observable in the orthogonal orientations of the FOD peaks which vary

331 continuously and coherently across multiple voxels (Fig. 5F). These observations confirm similar results from  
332 numerous high-resolution dMRI studies and suggest that cortical diffusion processes are locally oriented along  
333 orthogonal reference frames that match the tissue architecture and do not change significantly at the scale of a few  
334 hundred micrometers, providing a strong justification for describing diffusion processes at smaller length scales with  
335 the same fixed locally orthogonal reference frame.

## 336 **Cortical architectonic features revealed with cDTD MRI**

337 The SNR was estimated as the non-diffusion attenuated magnitude signal averaged in a region-of-interest (ROI)  
338 divided by the noise standard deviation measured in an ROI outside the brain using the raw magnitude signals  
339 (before post-processing). The cortical SNR varied between 50 and 120. Several imaging artifacts may contribute to  
340 an underestimation of the SNR, including:

- 341 1. ghosting/aliasing artifacts induced by the vibration of gradient coils (potentially leading to noise overestimation)
- 342 2. inaccurate calibration of the transmit and receive gains causing a non-zero background in the reconstructed  
343 images (potentially leading to noise overestimation), and
- 344 3. spatial inhomogeneities in the B1 sensitivity (potentially leading to tissue signal underestimation)

345 Our preliminary results of imaging 2D cDTDs in cortical GM reveal diffusion processes with distinct joint  
346 radial and tangential diffusivities and different specificities across cortical domains and layers. In Fig. 6, the spectral  
347 component images on the diagonal line  $\lambda_r = \lambda_t$  represent isotropic diffusion processes, while those below and above  
348 this line quantify anisotropic processes that can be described using prolate and oblate diffusion tensors, respectively.  
349 Comparing the maps of the 1D marginal distributions of  $\lambda_r$  (Fig. 6, left column) and  $\lambda_t$  (Fig. 6, top row) we found  
350 that the spectra of radial diffusivities in tissue microenvironments provides slightly better sensitivity to cortical layers  
351 than those of tangential diffusivities. Fig. 6B quantitatively maps the concentrations of eight distinct microscopic  
352 diffusion processes and were computed by integrating the 2D cDTDs over spectral domains (Fig. 6A, color-coded  
353 outlines) defined empirically based on spatial correlations of spectral components. The resulting signal component  
354 maps show high specificity to various cortical layers and were in good agreement with the diffusion orientational  
355 features observed in the FOD maps (Fig. 6C). For example, high concentrations of radial microscopic diffusion  
356 processes were observed primarily in the mid-cortical layers (Fig. 6B, Components 1 and 7) and in subcortical WM  
357 (Fig. 6B, Component 2), while high concentrations of more isotropic and tangential microscopic diffusion processes  
358 were observed primarily in the superficial and deep cortical layers (Fig. 6B, Components 5 and 8). The spatial  
359 distribution of Component 3 (Fig. 6B) in layer 3 and part of layers 5 and 6 matched with the distribution of  
360 non-pyramidal neurons in the parvalbumin stained section (not shown in Fig. 6). Meanwhile, the dense and patchy  
361 distribution of Component 6 (Fig. 6B) localized mainly in layer 5 corresponded to the intensely stained pyramidal  
362 neurons in this layer in AchE- (not shown in Fig. 6) and SMI-32-stained sections (Fig. 6D).

## 363 **Shape-size correlation spectra derived from the cDTD distributions**

364 The 2D  $\mu FA - MD$  correlation spectral amplitude maps in Fig. 7 provide a tally of the shape-size characteristics of  
365 the microscopic diffusion tensors of the DTD as a new means to characterize tissue microstructure. The largest  
366 concentrations of isotropic microscopic diffusion processes ( $\mu FA < 0.18$ ) were observed in the upper cortical layers,  
367 and to a lesser extent, in layer 5. The most anisotropic diffusion processes ( $\mu FA > 0.35$ ) were localized in the mid

368 cortical layers and in the subcortical white matter. The signal in subcortical WM voxels spanned a large range of  
369  $\mu FA$  values, potentially reflecting diffusion processes with a larger intravoxel orientational variance (e.g.,  
370 bending/crossing WM fibers) that may be inadequately described by the cDTDs. The 1D marginal distributions of  
371 both the microscopic fractional anisotropies (Fig. 7A, top row) and mean diffusivities (Fig. 7A, left column) derived  
372 from the  $\mu FA - MD$  spectra show layer-specific motifs that allow us to distinguish between superficial, mid, and  
373 deep cortical layers. Spectra of MD values in microscopic water pools show the highest concentration of low MD  
374 processes in WM (Fig. 7A, component 3), and a mixture of diffusion processes with low and high water mobilities in  
375 the mid-cortical layers, potentially indicating important differences in cellularity between these layers. Meanwhile,  
376 spectra of  $\mu FA$  values revealed predominantly anisotropic diffusion processes in the mid-cortical layers and more  
377 isotropic diffusion processes in the superficial and deep layers. Fig. 7B quantifies the spatial distributions and  
378 concentrations of five distinct microscopic diffusion components obtained by integrating the 2D  $\mu FA - MD$   
379 correlation spectra over empirically defined spectral domains (Fig. 7B, color-coded outlines). In Fig. 7B,  
380 Components 1, 3, and 4 are specific to the midcortical layers, while Components 2 and 5 are localized almost  
381 exclusively in the superficial/deep cortical layers and in subcortical WM, respectively. Component 3 in the  
382  $\mu FA - MD$  maps (Fig. 7B), shows very high  $\mu FA$  and likely corresponds in part to the signal from Component 1 in  
383 the  $\lambda_r - \lambda_t$  maps (Fig. 6B) with a small  $\lambda_r$  and large  $\lambda_t$ . It appears to suggest the presence of a small concentration  
384 of highly anisotropic oblate microscopic diffusion tensors.

385 It is likely that this component reflects restricted water diffusion within tangentially oriented tissue and cell  
386 processes (e.g., neurites, neurofilaments) which are powder-averaged within the plane of the mid-cortical layers (Fig.  
387 5E). In this case, the restricted tangential diffusion processes cannot be accurately modeled using tensors (e.g., a  
388 powder-average of prolate tensors) and the tangential diffusivities derived with DTD MRI, in general, do not  
389 accurately reflect the water diffusivities in different pools (e.g., inside or outside the dendrites). Nevertheless, even if  
390 the cDTD-derived diffusivity and anisotropies spectral components may not be quantitative (i.e., biased), they could  
391 still provide important clinical information about the density of tangentially oriented neurites or the transverse  
392 tortuosity of the extracellular space.

## 393 Potential sources of errors

394 The accuracy of the measured cDTD spectra depends on several experimental factors such as the number of  
395 measurements, the diffusion gradient directions, b-values, as well as SNR. During the voxel-wise cDTD  
396 reconstruction, the dMRI signals are decomposed along the axes of the local frame of reference. Consequently, for the  
397 same diffusion encoding (i.e., same DWI) the effective diffusion weightings (Eq. 6) of the radial and tangential  
398 diffusivities,  $b \cos^2 \phi_{\mathbf{g}}$  and  $b \sin^2 \phi_{\mathbf{g}}$ , respectively, may differ from voxel to voxel. To prevent biases due to the  
399 orientations of the local microstructure in the reconstructed cDTD maps it is important that the diffusion encodings  
400 uniformly sample the unit sphere for each b-value and across b-values.

401 Two additional potential sources of errors in the spatial-spectral mapping of microscopic diffusion processes  
402 with CORTECS MRI in this study may arise from 1. inaccuracies in estimating the DTI-derived reference frame, and  
403 2. inconsistencies between the axes of the DTI-derived reference frames across neighboring voxels due to the sorting  
404 bias of the diffusion tensor eigenvalue decomposition [Pierpaoli and Basser, 1996]. Both sources of errors become  
405 more prominent when the dMRI voxel signal is more isotropic. If the signal is isotropic in 3D, the principal diffusion  
406 axes are poorly-defined and the estimated diffusion reference frames may be inconsistent across adjacent voxels.

407 In cortical tissues, the DTI and, more generally, the dMRI signals are radially symmetric even at high spatial  
408 resolutions and high b-values. As a result, it is difficult to uniquely define orthogonal principal diffusion axes within

409 the tangential orientation. Instead, we can use a more economical characterization of the microscopic diffusion  
410 processes using a distribution of axisymmetric tensors. The resulting 2D cDTDs are completely defined by the  
411 correlation spectrum of radial and tangential diffusivities and the dominant diffusion direction (i.e., radial  
412 orientation), which can be reliably estimated in the cortex. The Diffusion-Encoded Color (DEC) map in Fig. 5 shows  
413 a continuously varying radial diffusion orientation along the cortical ribbon. Despite variations in diffusion anisotropy  
414 across cortical layers the principal axis of diffusion corresponding to the largest DTI eigenvalue,  $\epsilon_1 \epsilon_1^T$ , can be reliably  
415 estimated throughout the cortex and is consistently oriented normal to the cortical surface. Moreover, this  
416 orientation matches that of the largest FOD peak in each corresponding voxel. The side peaks of the FODs are  
417 consistently oriented in the tangential plane perpendicular to the radial direction, supporting the orthogonal  
418 alignment of diffusion processes, in good agreement with findings from previous high-resolution cortical dMRI studies  
419 [Aggarwal et al., 2015, Kleinnijenhuis et al., 2013, Leuze et al., 2014].

420 However, more generally, when DTI data is acquired with lower spatial resolution, low FA values in the cortex  
421 can bias the measurement of the radial direction that determines the 2D cDTD reference frame in each voxel. In this  
422 situation, it may be possible to use higher b-values (or longer diffusion times) to improve the sensitivity to the  
423 orientational features of the dMRI signal, and/or to estimate the voxel reference frame more reliably from the  
424 directions of the largest FOD peaks. Alternatively, one could derive a cortical reference frame from the curvature of  
425 the cortex measured using a structural scan with good GM-WM contrast as a proxy for the diffusion reference frame  
426 [Avram et al., 2020] or use spline interpolation of the diffusion tensor field [Pajevic et al., 2002] in low FA voxels, to  
427 derive a continuously varying reference frame that is consistent throughout the cortex.

## 428 1 Discussion

429 The CORTECS framework greatly simplifies the data acquisition and spectral reconstruction requirements for  
430 high-resolution DTD MRI and subsumes many previously proposed diffusion tensor models. It provides a practical  
431 and feasible approach to non-parametric quantitation of microstructural heterogeneity in healthy and diseased tissues.  
432 At its core, the framework relies on the observation that, in tissues with consistent well-defined architecture, such as  
433 the cortex, as we increase the spatial resolution from the scale of a conventional dMRI voxel ( $\approx 2mm$ ) relative to the  
434 radius of curvature of the underlying anatomy, the intravoxel angular dispersion of diffusion processes decreases. At  
435 the mesoscopic scale of a few hundred micrometers diffusion processes in distinct tissue microenvironments, e.g.,  
436 associated with myelin, intra-, extra-axonal water, remain largely coincident along the axes of a common reference  
437 frame determined by the local tissue architecture. At this length scale, the intravoxel angular dispersion due to  
438 cortical folding is significantly reduced and differences between subvoxel (microscopic) diffusion processes are  
439 primarily characterized by their principal diffusivities. Correlations between principal diffusivities explain most of the  
440 microscopic diffusion heterogeneity. They determine the anisotropies and mean diffusivities of the microscopic  
441 diffusion tensors, i.e., the shapes and sizes of their diffusion ellipsoids, rather than their relative orientations, allowing  
442 us to constrain the DTD reconstruction.

### 443 **The persistence of the principal diffusion orientations for various signal weightings**

444 The basis of constraining cortical diffusion processes to be oriented along local orthogonal directions in neural tissue  
445 has many lines of support. Direct observations of cortical cyto- and myelo-architectonic features with optical and 3D  
446 electron microscopy reveal dominant radial and tangential orientations. Meanwhile, histological validation studies

447 using high spatial and angular resolution dMRI with a range of mesoscopic spatial resolutions have repeatedly shown  
448 that in neural tissues the preferential diffusion directions align with the dominant orientation of the underlying  
449 microstructure. Moreover, results from numerous high-resolution dMRI studies suggest that when the relative signal  
450 contributions (weightings) from specific water pools are altered using different signal preparations the principal axes  
451 of the diffusion tensors and the orientations of the dominant FOD peaks in the voxel do not change [Assaf, 2019].  
452 Concretely, the dominant diffusion orientations do not change significantly in experiments with a wide range of echo  
453 times (T2-weightings) [Avram, 2011, Avram et al., 2012], repetition times, inversion times (T1-weightings) [Assaf,  
454 2019], b-values (diffusivity weightings) and diffusion times (chemical exchange and restriction weightings).  
455 Furthermore, *in vivo* experiments combining diffusion MRI and magnetization transfer (MT) preparation indicate  
456 that in white matter fibers the principal diffusion directions of myelin water and non-myelin water pools are  
457 coincident [Avram et al., 2010]. Similarly, *in vivo* diffusion tensor spectroscopy experiments of neuronal-specific  
458 metabolites, such as NAA have shown that diffusion processes in intra- and extracellular water pools are also aligned  
459 with the diffusion reference frame of the voxel [Ronen et al., 2013]. The persistence of the reference frame under  
460 various signal preparations suggests that the intravoxel orientational heterogeneity is dominated by the curvature of  
461 the macroscopic anatomy (e.g., cortical folding, fanning/bending WM pathways), and that water diffusion in specific  
462 microenvironments of neural tissues can be described adequately with a singular reference frame defined by the  
463 mesoscopic architecture. Finally, constraining subvoxel cortical diffusion tensor processes to the local reference frame  
464 of the mesoscopic voxel may also be justified with arguments from developmental biology.

## 465 **Orthogonal reference frames in neurodevelopment**

466 During morphogenesis, diffusion-reaction processes can establish orthogonal concentration gradients [Gregor et al.,  
467 2005, Turing, 1952] to support the efficient transport of macromolecules such as growth and inhibitory factors. It is  
468 believed that in early embryogenesis this mechanism [Gregor et al., 2005, Lefèvre and Mangin, 2010] leads to the  
469 formation of the principal axes of embryonic development: rostro-caudal, medio-lateral, and dorso-ventral [Kingsbury,  
470 1920]. Similarly, during early brain development diffusion-reaction processes at the microscopic scale, e.g.,  
471  $\approx 10 - 50\mu\text{m}$ , likely guide the growth of elongated cellular and sub-cellular structures, such as neurofilaments, axons  
472 and dendrites, which in turn, provide a scaffold for the diffusive migration and active transport of macromolecules  
473 over longer distances. The progressive elaboration of the orthogonal reference frame provides a plausible explanation  
474 for the architecture of cortical columns, laminae, and capillaries, at the mesoscopic scales of  $\approx 100 - 500\mu\text{m}$ .  
475 Diffusion MRI studies in the late stages of fetal neurodevelopment and newborns have shown a decrease in the radial  
476 coherence of diffusion processes [Dudink et al., 2015, Khan et al., 2019, McKinstry et al., 2002, Takahashi et al., 2011,  
477 Vasung et al., 2010].

478 More generally, several theories of brain development [Chen et al., 2013, Lefèvre and Mangin, 2010, Van Essen,  
479 1997, Wedeen et al., 2012] suggest to different extents, that similar locally orthogonal reference frames may be  
480 observed in WM at high spatial resolution. The intravoxel angular dispersion in WM voxels depends on the curvature  
481 of the fiber pathways (e.g., due to bending and fanning) as well as the presence of fiber crossings. The radii of  
482 curvature due to bending (e.g., corpus callosum) or fanning (e.g., corticospinal tract) in WM pathways are typically  
483 larger than those of the cortical folding geometry (e.g., sulci and gyri), even for short-range U-fibers. Consequently,  
484 at the mesoscopic spatial resolutions required for CORTECS MRI, the residual intravoxel orientational variation of  
485 diffusion processes in WM is due primarily to the crossing angles of subvoxel fiber populations. CORTECS MRI may  
486 be applicable in regions containing a single homogeneous WM pathway (i.e., no crossings), such as the corpus  
487 callosum, but not in most WM voxels that contain fiber populations that do not cross at orthogonal orientations.

488 Nevertheless, the framework could provide an independent method to test the hypothesized local orthogonality [Tax  
489 et al., 2016, 2017] at various spatial resolutions.

## 490 **The dimensionality reduction of cDTDs**

491 Current approaches for imaging DTDs and/or their features require SDE and MDE measurements and include  
492 parametric models using SDE [Jian et al., 2007] and combinations of SDE and MDE measurements [Henriques et al.,  
493 2020, Magdoom et al., 2021, Szczepankiewicz et al., 2016, Westin et al., 2016] as well as non-parametric methods  
494 [Topgaard, 2017]. Parametric DTD models approximate the solution using analytical functions such as a Wishart  
495 distribution [Jian et al., 2007] or a constrained normal tensor-variate distribution [Magdoom et al., 2021]. While such  
496 analytical approximations can estimate DTDs from fewer measurements and lower SNR levels, they drastically limit  
497 the space of admissible DTDs to those described by a handful of degrees of freedom (i.e., parameters or coefficients).  
498 The reconstructed DTDs may provide biased assessments in voxels affected by partial volume contributions from  
499 tissues with very different diffusion properties and may not accurately capture the range of unknown tissue  
500 alterations that occur in disease. Non-parametric or spectroscopic DTD reconstruction methods [Topgaard, 2017] can  
501 describe an arbitrary range of tissue compositions but, due to the large spectral dimensionality of the problem,  
502 require many MDE DWIs with high SNR and computationally intensive statistical reconstruction methods to enforce  
503 positive definiteness of the solution.

504 For a general, unconstrained non-parametric DTD, the microscopic diffusion tensors can have arbitrary  
505 orientations (Eq. 2). Consequently, the 6-dimensional random variable of the DTD must support both positive and  
506 negative off-diagonal tensor elements and cannot be analyzed with conventional ILT methods. To overcome this  
507 limitation, the DTD reconstruction requires computationally intensive statistical methods [Magdoom et al., 2021,  
508 Topgaard, 2017] to enforce positive definiteness constraints that ensure the physicality of the microscopic diffusion  
509 tensors. Alternatively, if we describe the DTD using the principal diffusivities,  $\lambda_1, \lambda_2, \lambda_3$  and the three Euler angles  
510  $\phi, \psi, \theta$ , which define the orientations of the orthonormal directions  $\epsilon_1, \epsilon_2, \epsilon_3$  in Eq. 1, then  $\phi, \psi, \theta$  create a  
511 trigonometric dependence in the signal equation. The key insight of the CORTECS MRI framework is that in tissues  
512 with well-defined, orthogonal architectures, sampling the spatial dimensions more densely, i.e., increasing the spatial  
513 resolution, reduces the intravoxel angular dispersion. This allows us to restrict the 3 degrees of freedom that  
514 determine the orientations of the tensor random variable, i.e. the three Euler angles, and thus reduce the domain of  
515 the DTD to the orthogonal non-negative 3D space of principal diffusivity random variables that guarantees positive  
516 definiteness and can be solved with a conventional ILT reconstruction techniques. This trade-off between spatial  
517 resolution and spectral dimensionality has several important implications for the clinical translation of  
518 non-parametric DTD MRI.

## 519 **Data acquisition requirements for CORTECS MRI**

520 In general, the SNR requirements for multidimensional spectral (i.e., non-parametric) reconstruction algorithms scale  
521 exponentially with the dimensionality of the problem. For a 2D spectral reconstruction, an SNR of 100 allows us to  
522 measure signal attenuations by a factor of 10 along two independent spectral dimensions. Meanwhile, to achieve the  
523 same effective dynamic range per dimension for a 4D spectral reconstruction, we need an SNR of 10,000. While such  
524 nominal SNR levels may be achievable on clinical scanners by using sufficiently large voxel sizes, the integrity of the  
525 data acquired *in vivo* may be corrupted [Avram et al., 2019, 2021] by:

- 526 1. imaging artifacts such as ghosting/aliasing, eddy current induced distortions, or Gibbs ringing, which typically  
527 represent  $\approx 1 - 2\%$  of the tissue signal; and
- 528 2. partial volume inconsistencies across DWIs due to subject and physiological motion (e.g., blood flow, pulsations,  
529 etc.).

530 In routine clinical MRI scans, e.g., T1W, T2W, DTI, typical SNR levels are between 20-50, and these signal artifacts  
531 on the order of  $\approx 2\%$  are barely visible. However, for an *in vivo* SNR = 10,000, these signal instabilities produce an  
532 artifact-to-noise ratio of 200, potentially biasing the estimation of non-parametric DTDs in high dimensional spaces  
533 (e.g., 4D or 6D) and rendering them unsuitable for clinical translation.

534 On the other hand, CORTECS MRI measures 3D or 2D correlation spectra using efficient diffusion  
535 preparations (SDEs), fewer measurement encodings (data points), and SNR levels that may be achieved for ultra-high  
536 resolution *in vivo* dMRI in the near future. Advances in various technologies including the design of high-field MRI  
537 scanners [Feinberg et al., 2021], high-performance gradient coils [Feinberg et al., 2021, Foo et al., 2020, Huang et al.,  
538 2021], high-density RF coil arrays [Hendriks et al., 2019, Keil et al., 2013], as well as efficient high-resolution dMRI  
539 pulse sequences [Avram et al., 2014b, Feinberg et al., 2010, Setsompop et al., 2018], image acquisition and  
540 reconstruction strategies [Feinberg et al., 2010, Setsompop et al., 2018], and experimental protocols [Avram et al.,  
541 2018, 2019, Nilsson et al., 2020] can be integrated synergistically in state-of-the-art MRI systems [Feinberg et al.,  
542 2021, Foo et al., 2020, Huang et al., 2021] to achieve the spatial resolution, scanning efficiency, and diffusion  
543 sensitizations required for *in vivo* CORTECS MRI.

544 In our experiment the acquisition of each high-resolution DWI volume required 52minutes. This relatively long  
545 duration scan duration is due to the use of:

- 546 1. a large imaging matrix of 375x320x230 needed for whole-brain coverage at  $200\mu m$  resolution, and
- 547 2. 3D diffusion spin echo EPI sequence with segmented k-space acquisition and a relatively long TR of 650ms.

548 The TR was chosen so as to minimize gradient heating (i.e., limit the gradient duty cycle), and included a 150ms  
549 duration for excitation, diffusion preparation, and EPI readout, and a 500ms idle duration. For clinical imaging, both  
550 factors can be significantly reduced. Firstly, using a multi-slice spin-echo diffusion EPI sequence with multiband  
551 capabilities one could acquire each DWI volume efficiently (negligible idle duration) in a single TR of 5-10s, albeit at  
552 a lower SNR. Secondly, it is important to point out that the requirement for high spatial resolution in CORTECS  
553 MRI does not necessarily require a prohibitively long scan duration. Unlike dMRI fiber tractography, CORTECS  
554 dMRI does not require whole-brain data. Using outer-volume suppression, reduced FOV, or ZOOM EPI one could  
555 significantly reduce the imaging matrix size and scan duration while still maintaining the required spatial resolution  
556 for *in vivo* scans with human subjects. On the other hand, the scan duration requirement of conventional  
557 non-parametric DTD methods is inherently limited by the very large number of encodings needed to sample the  
558 high-dimensional space exhaustively, even when scanning with a reduced FOV.

## 559 Spatial resolution requirement in CORTECS MRI

560 The major drawback of CORTECS MRI compared to conventional (unconstrained) nonparametric DTD methods is  
561 the prerequisite of sufficiently high spatial resolution ( $\approx 400\mu m$ ). The spatial resolution at which we can adopt a  
562 common reference frame for all subvoxel diffusion tensors depends on the cortical folding geometry and may vary  
563 across the brain. A useful quantity to characterize the validity of this assumption is the dimensionless ratio between



564 the voxel length,  $x$ , and the minimum radius of curvature of the macroscopic anatomy (e.g., cortical folding, or  
565 bending/fanning of WM fibers),  $R$ . If this ratio is sufficiently small  $\frac{x}{R} \ll 1$ , then we can ignore orientational  
566 variations of subvoxel diffusion processes (Fig. 1). For example given a voxel size of  $x = 0.2mm$  the expected  
567 maximum intravoxel angular variance of the microstructural reference frame due to the continuously varying cortical  
568 folding geometry is  $\pm 1.9^\circ$  for  $R = 5mm$  and  $\pm 4.9^\circ$  for  $R = 2mm$ . This angular variation is smaller than even the  
569 most ambitious estimates of angular resolution limits in diffusion MRI fiber tractography and is unlikely to bias the  
570 estimated spectra. HARDI experiments using well-calibrated diffusion phantoms with overlapping, highly anisotropic  
571 coherent structures oriented at different angles cannot typically resolve diffusion processes due to fibers crossing at  
572 angles  $< 10^\circ$ , even when a large number of gradient orientations with large b-values and high SNR levels are used in  
573 microimaging or clinical scanners [Guise et al., 2016, Perrin et al., 2005]. This angular resolution limit provides a  
574 good benchmark for the ability to accurately resolve the orientations of subvoxel diffusion tensor processes with  
575 conventional 6D nonparametric DTD MRI methods.

576 The high spatial resolution requirement in CORTECS MRI can lead to significantly longer acquisition time per  
577 volume (i.e., per diffusion encoding), when compared to conventional (unconstrained) nonparametric DTD MRI  
578 methods. These methods require large imaging voxel volumes to achieve the very high SNR and signal dynamic range  
579 needed for 6D or 4D DTD reconstructions and can be affected by signal artifacts. Moreover, these methods also  
580 require a large number of joint (multidimensional) encodings to comprehensively sample the high-dimensional  
581 parameter space, thereby offsetting potential savings in the total scan duration that may be gained by imaging a  
582 smaller matrix size (i.e., larger voxels), when compared to CORTECS MRI. Most importantly, however, the 6D  
583 DTDs measured in voxels of  $\approx 3mm$  do not provide any information about the relative spatial distribution of  
584 subvoxel diffusion tensors, i.e., at length scales smaller than  $\approx 3mm$ . Due to its high spatial resolution requirement,  
585 CORTECS MRI explicitly measures the relative spatial distributions (and relative orientations!) of diffusion tensor  
586 processes at much finer length scales, e.g., down to  $200\mu m$  in our study, providing significantly more information.  
587 Compared to conventional DTD methods, this higher spatial resolution in CORTECS MRI provides more accurate  
588 localization and improved sensitivity in the detection of subtle pathological tissue changes, for example in the early  
589 stages of neurodegeneration.

## 590 Potential for quantifying diffusion time dependence

591 All DTD MRI methods assume that the voxel can be viewed as an ensemble of non-exchanging Gaussian (i.e., freely  
592 diffusing) subvoxel water pools within which the diffusive motions of spins are described with tensors whose  
593 corresponding ellipsoids have different sizes, shapes, and orientations. In biological tissues, cellular and subcellular  
594 structures can present microscopic restrictions and hindrances producing a time-dependent (non-Gaussian) diffusion  
595 in certain water pools. To address this limitation, the MDE-based DTD frameworks [Topgaard, 2017], can be  
596 extended to include diffusion time dependence [Lundell et al., 2019], and/or analyzed using parametric models  
597 [Henriques et al., 2020]. The characteristics of time-dependent DTDs can yield important tissue microstructural  
598 information about the distribution of compartment shapes and sizes [Henriques et al., 2020, Lundell et al., 2019] that  
599 classical MDE experiments sought to measure [Avram et al., 2013b, Benjamini et al., 2016, Koch and Finsterbusch,  
600 2008, Komlosh et al., 2018]. However, it can be troublesome to incorporate the dependence of diffusion processes on  
601 the time-varying diffusion gradient waveforms into the signal equation, even for MDE preparations with well-defined  
602 diffusion time parameters such as those using double pulsed field gradients [Avram et al., 2013b, Mitra, 1995], or  
603 rotating field gradients [Avram et al., 2014a]. Conversely, the diffusion time dependence of SDE measurements can  
604 provide similar information to MDE measurements [Jespersen, 2012] and is described by a well-defined parameter  $\Delta$ ,

605 the separation between the start times of the two diffusion gradient pulses. Moreover, since the voxel reference frame  
606 does not change significantly with diffusion time [Assaf, 2019], we can directly extend the CORTECS framework to  
607 map time-dependent cDTDs by repeating the experiment with multiple diffusion times. Imaging correlation spectra of  
608 diffusion-time-dependent principal diffusivities in microscopic water pools may provide important pathophysiological  
609 information about microscopic restrictions, chemical exchange, and water transport [Nilsson et al., 2013].

## 610 **Relation to other dMRI methods**

611 The non-parametric cDTD signal representation can be viewed as a multi-tensor generalization of high-resolution  
612 DTI. It subsumes many parametric tissue diffusion models for WM [Stanisz et al., 1997] and GM [Avram et al., 2020,  
613 Mulkern et al., 1999] and enables their cross-validation. It can inform the design of more efficient dMRI experiments  
614 using SDEs and MDEs to measure parametric DTDs and tensor mixture models for specific clinical applications.  
615 Moreover, it provides an independent method for deriving DTD-related quantities, such as the non-parametric  
616 distribution of subvoxel MD values which can be measured efficiently in a 6 min clinical scan [Avram et al., 2019]. In  
617 this way, the proposed framework may help test the validity of various DTD methods and guide their development  
618 towards achieving higher spatial resolution and greater biological specificity.

619 The ability to quantify tissue properties non-parametrically is crucial to our understanding of disease  
620 progression, tissue regeneration, and neurodevelopment. By quantifying subvoxel DTDs non-parametrically we can  
621 identify the most prominent spectral features such as the shapes and peaks or multimodal clusters associated with  
622 specific pathophysiological changes. Once we learn these spectral signatures, we can model the CORTECS-derived  
623 2D or 3D cDTDs using analytical functions determined by only a few parameters. Disease-specific parametric cDTD  
624 could be reconstructed swiftly and efficiently from data acquired with lower SNR and a smaller number of encodings.

## 625 **Further improvements in biological specificity**

626 The correlation spectrum of principal diffusivities may reveal signal contributions from specific tissue components,  
627 such as intra-axonal, extracellular, or myelin water whose diffusion tensors may be coincident and are therefore  
628 difficult to disentangle based on orientational diffusion characteristics such as FODs derived from HARDI data. A  
629 further improvement in biological specificity may be achieved by integrating the cDTD measurements with  
630 multidimensional relaxation MRI methods [Benjamini and Basser, 2017, Kim et al., 2017] which measure the net  
631 voxel signal as a superposition of contributions from subvoxel water pools with different joint T1-, T2- and diffusion  
632 properties. However, with the addition of new dimensions for contrast encoding, most implementations of  
633 diffusion-relaxation correlation MRI on clinical scanners require larger datasets, higher SNR levels as well as the use  
634 of sophisticated pulse sequences and algorithms to reconstruct five-dimensional [Reymbaut et al., 2021] or  
635 six-dimensional [de Almeida Martins et al., 2021] correlation spectra. We have recently proposed a more practical  
636 two-dimensional diffusion-relaxation MRI method for efficiently mapping T1-MD correlation spectra using isotropic  
637 diffusion encoded (IDE) DWIs [Avram et al., 2021]. Similarly, the CORTECS framework adds the minimum number  
638 of dimensions (principal diffusivities) needed to efficiently combine T1- or T2- relaxation with diffusion tensor  
639 spectroscopic imaging.

## 640 **Potential applications to neuroscience and neuroradiology**

641 Mapping water pools in specific cortical microenvironments based on their diffusion tensor properties quantitatively  
642 and efficiently could have numerous applications in neuroradiology and neuroscience. It may improve the diagnosis of

643 neurodevelopmental disorders and allow us to specifically disentangle contributions from increased dendritic  
644 arborization and reductions in radial glial fibers to the cortical microstructural changes observed in newborns. In  
645 addition, it may provide biomarkers for early detection of cortical microstructural changes occurring in epilepsy  
646 [Lampinen et al., 2020], cancer [Szczeplankiewicz et al., 2016], traumatic brain injury [Komlosh et al., 2018], stroke  
647 [Alves et al., 2022], or multiple sclerosis [He et al., 2021]. Mapping correlations between cortical diffusion processes  
648 with CORTECS MRI could quantify specific cellular/tissue components providing new parameters for automatic  
649 cortical parcellation and layer segmentation algorithms. Relating these layer-specific components to input and output  
650 signaling in cortical areas could allow us to study intracortical connectivity and gain insight into the directionality of  
651 information flows (signaling) in functional networks throughout the connectome [Olman et al., 2012, Uğurbil et al.,  
652 2013]. Because it requires only SDE data, CORTECS MRI can be applied retrospectively to analyze existing  
653 high-resolution diffusion MRI data sets. Finally, while this study focuses on quantifying diffusion in cortical gray  
654 matter, CORTECS MRI may also be applicable to other organized tissues with varying degrees of macroscopic and  
655 microscopic diffusion anisotropies such as in white matter, kidney medulla, heart muscle, skeletal muscle, ligaments,  
656 tendons, etc.

## 657 2 Conclusions

658 This study provides a new framework for empirical and biologically specific analyses of subvoxel diffusion  
659 heterogeneity in healthy and diseased brain tissue using conventional high-resolution dMRI. From the non-parametric  
660 cDTDs we can derive additional spectral and scalar parameters, such as the joint size-shape distribution of  
661 microscopic diffusion tensors. Our preliminary results in the macaque monkey cortex reveal diffusion components  
662 that correlate well with distinct architectonic features. CORTECS MRI has the potential to advance the clinical  
663 translation of DTD MRI and the optimization for specific applications in clinical and basic sciences. Features of  
664 cDTD spectra may help better delineate cortical layers and areas in healthy subjects and may provide new  
665 biomarkers for finding subtle cortical abnormalities underlying focal dysplasia in epilepsy, microbleeds in traumatic  
666 brain injury, metastatic cancers, etc.

## 667 Conflict of Interest Statement

668 The authors declare that the research was conducted in the absence of any commercial or financial relationships that  
669 could be construed as a potential conflict of interest.

## 670 Acknowledgments

671 This work was supported by the Intramural Research Program of the *Eunice Kennedy Shriver* National Institute of  
672 Child Health and Human Development, “Connectome 2.0: Developing the next generation human MRI scanner for  
673 bridging studies of the micro-, meso- and macro-connectome”, NIH BRAIN Initiative 1U01EB026996-01 and the  
674 CNRM Neuroradiology-Neuropathology Correlation/Integration Core, 309698-4.01-65310, (CNRM-89-9921). We  
675 thank Drs. Michal Komlosh, Cecyl Chern-Chyi Yen, and Frank Ye for assistance with sample preparation and data  
676 acquisition, Drs. Paul Taylor and Daniel Glen for helpful discussions and Drs. Bernard Dardzinski and Alexandru  
677 Korotcov for providing the RF coil used in this experiment. We thank Tom Pohida and Marcial Garmendia-Cedillos  
678 for their help in constructing the 3D brain mold. We also thank Drs. Ted Usdin and Sarah Williams-Avram as well

679 as Drs. Vincent Schram and Ross Lake for help with optical imaging and digitization of microscope slides, and FD  
680 Neurotech for histological services provided. Also, we thank Drs. Betsy Murray and Richard Sanders in the  
681 Laboratory of Neurophysiology in NIMH for providing the perfusion-fixed monkey brains for our experiments.

682 The opinions expressed herein are those of the authors and not necessarily representative of those of the  
683 Uniformed Services University of the Health Sciences (USUHS), the Department of Defense (DoD), VA, NIH or any  
684 other US government agency, or the Henry M. Jackson Foundation.

## 685 References

- 686 M. Aggarwal, D. W. Nauen, J. C. Troncoso, and S. Mori. Probing region-specific microstructure of human cortical  
687 areas using high angular and spatial resolution diffusion MRI. *NeuroImage*, 105:198–207, 2015. URL  
688 <https://doi.org/10.1016/j.neuroimage.2014.10.053>.
- 689 Rita Alves, Rafael Neto Henriques, Leevi Kerkelä, Cristina Chavarrías, Sune N. Jespersen, and Noam Shemesh.  
690 Correlation Tensor MRI deciphers underlying kurtosis sources in stroke. *NeuroImage*, 247:118833, 2022. ISSN  
691 1053-8119. URL <https://doi.org/10.1016/j.neuroimage.2021.118833>.
- 692 Katrin Amunts and Karl Zilles. Architectonic mapping of the human brain beyond Brodmann. *Neuron*, 88(6):  
693 1086–1107, 2015. ISSN 0896-6273. URL <https://doi.org/10.1016/j.neuron.2015.12.001>.
- 694 Yaniv Assaf. Imaging laminar structures in the gray matter with diffusion MRI. *NeuroImage*, 197:677–688, 2019.  
695 ISSN 1053-8119. URL <https://doi.org/10.1016/j.neuroimage.2017.12.096>.
- 696 Yaniv Assaf and Peter J Basser. Composite hindered and restricted model of diffusion (CHARMED) MR imaging of  
697 the human brain. *Neuroimage*, 27(1):48–58, 2005. ISSN 1053-8119. URL  
698 <https://doi.org/10.1016/j.neuroimage.2005.03.042>.
- 699 A. V. Avram. *Diffusion Tensor Imaging of Myelin Water*. Thesis, Duke University, 2011. URL  
700 [https://www.researchgate.net/publication/317630937\\_Diffusion\\_Tensor\\_Imaging\\_of\\_Myelin\\_Water](https://www.researchgate.net/publication/317630937_Diffusion_Tensor_Imaging_of_Myelin_Water).
- 701 A. V. Avram, A. Guidon, C. Liu, and A. W. Song. Multi-TE diffusion kurtosis imaging in vivo. In *Proc. Intl. Soc.*  
702 *Magn. Res. Med.*, volume 20, page 3270, 2012. URL [https://www.researchgate.net/publication/299408014\\_Multi-TE\\_diffusion\\_kurtosis\\_imaging\\_in\\_vivo](https://www.researchgate.net/publication/299408014_Multi-TE_diffusion_kurtosis_imaging_in_vivo).
- 704 Alexandru V Avram, Arnaud Guidon, and Allen W Song. Myelin water weighted diffusion tensor imaging.  
705 *Neuroimage*, 53(1):132–138, 2010. ISSN 1053-8119. URL  
706 <https://doi.org/10.1016/j.neuroimage.2010.06.019>.
- 707 Alexandru V Avram, Joelle E Sarlls, and Peter J Basser. Whole-brain assessment of microscopic anisotropy using  
708 multiple pulse-field gradient (mPFG) diffusion MRI. In *Proceedings of the 22nd Annual Meeting of the ISMRM*,  
709 volume 21, page 2072, 2013a. URL [https://www.researchgate.net/publication/299407932\\_Whole-brain\\_](https://www.researchgate.net/publication/299407932_Whole-brain_assessment_of_microscopic_anisotropy_using_multiple_pulse-field_gradient_mPFG_diffusion_MRI)  
710 [assessment\\_of\\_microscopic\\_anisotropy\\_using\\_multiple\\_pulse-field\\_gradient\\_mPFG\\_diffusion\\_MRI](https://www.researchgate.net/publication/299407932_Whole-brain_assessment_of_microscopic_anisotropy_using_multiple_pulse-field_gradient_mPFG_diffusion_MRI).
- 711 Alexandru V. Avram, Evren Özarslan, Joelle E. Sarlls, and Peter J. Basser. In vivo detection of microscopic  
712 anisotropy using quadruple pulsed-field gradient (qPFG) diffusion MRI on a clinical scanner. *NeuroImage*, 64:  
713 229–239, 2013b. ISSN 1053-8119. URL <https://doi.org/10.1016/j.neuroimage.2012.08.048>.

- 714 Alexandru V Avram, Sarlls Joelle E, Peter J Basser, and Evren Ozarslan. Rotating Field Gradient (RFG) Diffusion  
715 MRI for Mapping 3D Orientation Distribution Functions (ODFs) in the Human Brain. In *Proceedings of the 22nd*  
716 *Annual Meeting of the ISMRM*, volume 22, page 4453, 2014a. URL  
717 [https://www.researchgate.net/publication/299407747\\_Rotating\\_Field\\_Gradient\\_RFG\\_Diffusion\\_MRI\\_](https://www.researchgate.net/publication/299407747_Rotating_Field_Gradient_RFG_Diffusion_MRI_for_Mapping_3D_Orientation_Distribution_Functions_ODFs_in_the_Human_Brain)  
718 [for\\_Mapping\\_3D\\_Orientation\\_Distribution\\_Functions\\_ODFs\\_in\\_the\\_Human\\_Brain](https://www.researchgate.net/publication/299407747_Rotating_Field_Gradient_RFG_Diffusion_MRI_for_Mapping_3D_Orientation_Distribution_Functions_ODFs_in_the_Human_Brain).
- 719 Alexandru V Avram, Arnaud Guidon, Trong-Kha Truong, Chunlei Liu, and Allen W Song. Dynamic and inherent B0  
720 correction for DTI using stimulated echo spiral imaging. *Magnetic resonance in medicine*, 71(3):1044–1053, 2014b.  
721 ISSN 0740-3194. URL <https://doi.org/10.1002/mrm.24767>.
- 722 Alexandru V Avram, Joelle E Sarlls, Alan S Barnett, Evren Özarslan, Cibu Thomas, M Okan Irfanoglu, Elizabeth  
723 Hutchinson, Carlo Pierpaoli, and Peter J Basser. Clinical feasibility of using mean apparent propagator (MAP)  
724 MRI to characterize brain tissue microstructure. *NeuroImage*, 127:422–434, 2016. ISSN 1053-8119. URL  
725 <https://doi.org/10.1016/j.neuroimage.2015.11.027>.
- 726 Alexandru V. Avram, Joelle E. Sarlls, Elizabeth Hutchinson, and Peter J. Basser. Efficient experimental designs for  
727 isotropic generalized diffusion tensor MRI (IGDTI). *Magnetic Resonance in Medicine*, 79(1):180–194, 2018. ISSN  
728 0740-3194. URL <https://doi.org/10.1002/mrm.26656>.
- 729 Alexandru V Avram, Joelle E Sarlls, and Peter J Basser. Measuring non-parametric distributions of intravoxel mean  
730 diffusivities using a clinical MRI scanner. *Neuroimage*, 185:255–262, 2019. ISSN 1053-8119. URL  
731 <https://doi.org/10.1016/j.neuroimage.2018.10.030>.
- 732 Alexandru V. Avram, K. S Saleem, F. Q. Ye, C. C. Yen, M. E. Komlosh, and P. J. Basser. Modeling cortical  
733 architectonic features by analyzing diffusion mri data in the cortical reference frame. In *Proceedings of the 28th*  
734 *Annual Meeting of the ISMRM*, volume 28, page 713, 2020. URL  
735 [https://www.researchgate.net/publication/351565298\\_Modeling\\_cortical\\_architectonic\\_features\\_](https://www.researchgate.net/publication/351565298_Modeling_cortical_architectonic_features_by_analyzing_diffusion_MRI_data_in_the_cortical_reference_frame)  
736 [by\\_analyzing\\_diffusion\\_MRI\\_data\\_in\\_the\\_cortical\\_reference\\_frame](https://www.researchgate.net/publication/351565298_Modeling_cortical_architectonic_features_by_analyzing_diffusion_MRI_data_in_the_cortical_reference_frame).
- 737 Alexandru V. Avram, Joelle E. Sarlls, and Peter J. Basser. Whole-Brain Imaging of Subvoxel T1-Diffusion  
738 Correlation Spectra in Human Subjects. *Frontiers in Neuroscience*, 15(682), 2021. ISSN 1662-453X. URL  
739 <https://doi.org/10.3389/fnins.2021.671465>.
- 740 Ruiliang Bai, Alexander Cloninger, Wojciech Czaja, and Peter J Basser. Efficient 2D MRI relaxometry using  
741 compressed sensing. *Journal of Magnetic Resonance*, 255:88–99, 2015. ISSN 1090-7807. URL  
742 <https://doi.org/10.1016/j.jmr.2015.04.002>.
- 743 P. J. Basser, J. Mattiello, and D. LeBihan. MR diffusion tensor spectroscopy and imaging. *Biophysical Journal*, 66  
744 (1):259–267, 1994a. ISSN 0006-3495. URL [https://doi.org/10.1016/S0006-3495\(94\)80775-1](https://doi.org/10.1016/S0006-3495(94)80775-1).
- 745 Peter J Basser, James Mattiello, and Denis LeBihan. Estimation of the effective self-diffusion tensor from the NMR  
746 spin echo. *Journal of Magnetic Resonance, Series B*, 103(3):247–254, 1994b. ISSN 1064-1866. URL  
747 <https://doi.org/10.1006/jmrb.1994.1037>.
- 748 M. Bastiani, A. M. Oros-Peusquens, A. Seehaus, D. Brenner, K. Möllenhoff, A. Celik, J. Felder, H. Bratzke, N. J.  
749 Shah, R. Galuske, R. Goebel, and A. Roebroek. Automatic segmentation of human cortical layer-complexes and  
750 architectural areas using Ex vivo diffusion MRI and its validation. *Frontiers in Neuroscience*, 10(NOV), 2016. URL  
751 <https://doi.org/10.3389/fnins.2016.00487>.

- 752 Dan Benjamini and Peter J. Basser. Use of marginal distributions constrained optimization (MADCO) for  
753 accelerated 2D MRI relaxometry and diffusometry. *Journal of Magnetic Resonance*, 271:40–45, 2016. ISSN  
754 1090-7807. doi: <https://doi.org/10.1016/j.jmr.2016.08.004>.
- 755 Dan Benjamini and Peter J. Basser. Magnetic resonance microdynamic imaging reveals distinct tissue  
756 microenvironments. *NeuroImage*, 163:183–196, 2017. ISSN 1053-8119. URL  
757 <https://doi.org/10.1016/j.neuroimage.2017.09.033>.
- 758 Dan Benjamini, Michal E. Komlosh, Lynne A. Holtzclaw, Uri Nevo, and Peter J. Basser. White matter  
759 microstructure from nonparametric axon diameter distribution mapping. *NeuroImage*, 135:333–344, 2016. ISSN  
760 1053-8119. URL <https://doi.org/10.1016/j.neuroimage.2016.04.052>.
- 761 Korbinian Brodmann. *Vergleichende Lokalisationslehre der Grosshirnrinde in ihren Prinzipien dargestellt auf Grund*  
762 *des Zellenbaues*. Barth, 1909.
- 763 M. D. Budde and J. Annese. Quantification of anisotropy and fiber orientation in human brain histological sections.  
764 *Front. Integr. Neurosci.*, 7:3, 2013. URL <https://doi.org/10.3389/fnint.2013.00003>.
- 765 Ramon Y Cajal. *Histologie du système nerveux de l'homme et des vertébrés*. Paris, 1909.
- 766 PT Callaghan and ME Komlosh. Locally anisotropic motion in a macroscopically isotropic system: displacement  
767 correlations measured using double pulsed gradient spin-echo NMR. *Magnetic Resonance in Chemistry*, 40(13):  
768 S15–S19, 2002. ISSN 0749-1581. URL <https://doi.org/10.1016/j.jmr.2007.07.003>.
- 769 H. Chen, T. Zhang, L. Guo, K. Li, X. Yu, L. Li, X. Hu, J. Han, X. Hu, and T. Liu. Coevolution of gyral folding and  
770 structural connection patterns in primate brains. *Cerebral Cortex*, 23(5):1208–1217, 2013. URL  
771 <https://doi.org/10.1093/cercor/bhs113>.
- 772 DG Cory, AN Garroway, and JB Miller. Applications of spin transport as a probe of local geometry. In *Abstracts of*  
773 *Papers of the American Chemical Society*, volume 199, pages 105–POLY. American Chemical Society 1155 16th St,  
774 NW, WASHINGTON, DC 20036, 1990. ISBN 0065-7727.
- 775 Michiel Cottaar, Matteo Bastiani, Charles Chen, Krikor Dikranian, David Van Essen, Timothy E. Behrens,  
776 Stamatios N. Sotiropoulos, and Saad Jbabdi. A gyral coordinate system predictive of fibre orientations.  
777 *NeuroImage*, 176:417–430, 2018. ISSN 1053-8119. URL <https://doi.org/10.1016/j.neuroimage.2018.04.040>.
- 778 João P. de Almeida Martins, Chantal M. W. Tax, Alexis Reymbaut, Filip Szczepankiewicz, Maxime Chamberland,  
779 Derek K. Jones, and Daniel Topgaard. Computing and visualising intra-voxel orientation-specific  
780 relaxation–diffusion features in the human brain. *Human Brain Mapping*, 42(2):310–328, 2021. ISSN 1065-9471.  
781 URL <https://doi.org/10.1002/hbm.25224>.
- 782 Thijs Dhollander, Robert Elton Smith, Jacques-Donald Tournier, Ben Jeurissen, and Alan Connelly. Time to move  
783 on: an fod-based dec map to replace dti’s trademark dec fa. *Proc Intl Soc Mag Reson Med*, 23:1027, 2015.
- 784 Jeroen Dudink, Kay Pieterman, Alexander Leemans, M Kleinnijenhuis, AM van Cappellen van Walsum, and  
785 FE Hoebeek. Recent advancements in diffusion MRI for investigating cortical development after preterm  
786 birth—potential and pitfalls. *Frontiers in human neuroscience*, 8:1066, 2015. ISSN 1662-5161. URL  
787 <https://doi.org/10.3389/fnhum.2014.01066>.

- 788 Tim B. Dyrby, William F.C. Baaré, Daniel C. Alexander, Jacob Jelsing, Ellen Garde, and Lise V. Sogaard. An ex  
789 vivo imaging pipeline for producing high-quality and high-resolution diffusion-weighted imaging datasets. *Human*  
790 *Brain Mapping*, 32(4):544–563, 2011. ISSN 1065-9471. URL <https://doi.org/10.1002/hbm.21043>.
- 791 D. Feinberg, P. Dietz, C. Liu, K. Setsompop, P. Mukherjee, L. L. Wald, A. T. Vu, A. Beckett, I. Gonzalez Insua,  
792 M. Schroeder, S. Stocker, P.H. Bell, E. Rummert, and M. Davids. Design and development of a next-generation 7T  
793 human brain scanner with high-performance gradient coil and dense RF arrays. In *Proceedings of the 29th Annual*  
794 *Meeting of the ISMRM*, volume 29, page 562, 2021.
- 795 David A Feinberg, Steen Moeller, Stephen M Smith, Edward Auerbach, Sudhir Ramanna, Matt F Glasser, Karla L  
796 Miller, Kamil Ugurbil, and Essa Yacoub. Multiplexed echo planar imaging for sub-second whole brain fMRI and  
797 fast diffusion imaging. *PloS one*, 5(12):e15710, 2010. ISSN 1932-6203. URL  
798 <https://doi.org/10.1371/journal.pone.0015710>.
- 799 Thomas K. F. Foo, Ek Tsoon Tan, Mark E. Vermilyea, Yihe Hua, Eric W. Fiveland, Joseph E. Piel, Keith Park,  
800 Justin Ricci, Paul S. Thompson, Dominic Graziani, Gene Conte, Alex Kagan, Ye Bai, Christina Vasil, Matthew  
801 Tarasek, Desmond T.B. Yeo, Franklyn Snell, David Lee, Aaron Dean, J. Kevin DeMarco, Robert Y. Shih,  
802 Maureen N. Hood, Heechin Chae, and Vincent B. Ho. Highly efficient head-only magnetic field insert gradient coil  
803 for achieving simultaneous high gradient amplitude and slew rate at 3.0T (MAGNUS) for brain microstructure  
804 imaging. *Magnetic Resonance in Medicine*, 83(6):2356–2369, 2020. ISSN 0740-3194. URL  
805 <https://doi.org/10.1002/mrm.28087>.
- 806 Thomas Gregor, William Bialek, Rob R. de Ruyter van Steveninck, David W. Tank, and Eric F. Wieschaus.  
807 Diffusion and scaling during early embryonic pattern formation. *Proceedings of the National Academy of Sciences*,  
808 102(51):18403–18407, 2005. ISSN 0027-8424. URL <https://doi.org/10.1073/pnas.0509483102>.
- 809 Catarina Guise, Margarida M. Fernandes, João M. Nóbrega, Sudhir Pathak, Walter Schneider, and Raul Fangueiro.  
810 Hollow Polypropylene Yarns as a Biomimetic Brain Phantom for the Validation of High-Definition Fiber  
811 Tractography Imaging. *ACS Applied Materials and Interfaces*, 8(44):29960–29967, 2016. ISSN 1944-8244. URL  
812 <https://doi.org/10.1021/acsami.6b09809>.
- 813 Omer F. Gulban, Federico De Martino, An T. Vu, Essa Yacoub, Kamil Ugurbil, and Christophe Lenglet. Cortical  
814 fibers orientation mapping using in-vivo whole brain 7T diffusion MRI. *NeuroImage*, 178:104–118, 2018. ISSN  
815 1053-8119. URL <https://doi.org/10.1016/j.neuroimage.2018.05.010>.
- 816 Per Christian Hansen. Analysis of discrete ill-posed problems by means of the L-curve. *SIAM review*, 34(4):561–580,  
817 1992. ISSN 0036-1445. URL <https://doi.org/10.1137/1034115>.
- 818 Yi He, Susana Aznar, Hartwig R. Siebner, and Tim B. Dyrby. In vivo tensor-valued diffusion MRI of focal  
819 demyelination in white and deep grey matter of rodents. *NeuroImage: Clinical*, 30:102675, 2021. ISSN 2213-1582.  
820 URL <https://doi.org/10.1016/j.nicl.2021.102675>.
- 821 Robin M. Heidemann, David A. Porter, Alfred Anwander, Thorsten Feiweier, Keith Heberlein, Thomas R. Knösche,  
822 and Robert Turner. Diffusion imaging in humans at 7T using readout-segmented EPI and GRAPPA. *Magnetic*  
823 *Resonance in Medicine*, 64(1):9–14, 2010. ISSN 0740-3194. URL <https://doi.org/10.1002/mrm.22480>.

- 824 Arjan D. Hendriks, Peter R. Luijten, Dennis W. J. Klomp, and Natalia Petridou. Potential acceleration performance  
825 of a 256-channel whole-brain receive array at 7 T. *Magnetic Resonance in Medicine*, 81(3):1659–1670, 2019. ISSN  
826 0740-3194. URL <https://doi.org/10.1002/mrm.27519>.
- 827 Rafael Neto Henriques, Sune Nørhøj Jespersen, and Noam Shemesh. Correlation tensor magnetic resonance imaging.  
828 *NeuroImage*, 211:116605, 2020. ISSN 1053-8119. URL <https://doi.org/10.1016/j.neuroimage.2020.116605>.
- 829 Susie Y. Huang, Thomas Witzel, Boris Keil, Alina Scholz, Mathias Davids, Peter Dietz, Elmar Rummert, Rebecca  
830 Ramb, John E. Kirsch, Anastasia Yendiki, Qiuyun Fan, Qiyuan Tian, Gabriel Ramos-Llordén, Hong-Hsi Lee, Aapo  
831 Nummenmaa, Berkin Bilgic, Kawin Setsompop, Fuyixue Wang, Alexandru V. Avram, Michal Komlos, Dan  
832 Benjamin, Kulam Najmudeen Magdoom, Sudhir Pathak, Walter Schneider, Dmitry S. Novikov, Els Fieremans,  
833 Slimane Tounekti, Choukri Mekkaoui, Jean Augustinack, Daniel Berger, Alexander Shapson-Coe, Jeff Lichtman,  
834 Peter J. Basser, Lawrence L. Wald, and Bruce R. Rosen. Connectome 2.0: Developing the next-generation  
835 ultra-high gradient strength human mri scanner for bridging studies of the micro-, meso- and macro-connectome.  
836 *NeuroImage*, 243:118530, 2021. ISSN 1053-8119. URL <https://doi.org/10.1016/j.neuroimage.2021.118530>.
- 837 T. Jaermann, N. De Zanche, P. Staempfli, K.P. Pruessmann, A. Valavanis, P. Boesiger, and S.S. Kollias. Preliminary  
838 Experience with Visualization of Intracortical Fibers by Focused High-Resolution Diffusion Tensor Imaging.  
839 *American Journal of Neuroradiology*, 29(1):146–150, 2008. URL <https://doi.org/10.3174/ajnr.A0742>.
- 840 Jens H Jensen, Joseph A Helpert, Anita Ramani, Hanzhang Lu, and Kyle Kaczynski. Diffusional kurtosis imaging:  
841 the quantification of non-gaussian water diffusion by means of magnetic resonance imaging. *Magnetic Resonance in*  
842 *Medicine: An Official Journal of the International Society for Magnetic Resonance in Medicine*, 53(6):1432–1440,  
843 2005. ISSN 0740-3194. URL <https://doi.org/10.1002/mrm.20508>.
- 844 Sune Nørhøj Jespersen. Equivalence of double and single wave vector diffusion contrast at low diffusion weighting.  
845 *NMR in Biomedicine*, 25(6):813–818, 2012. ISSN 0952-3480. URL <https://doi.org/10.1002/nbm.1808>.
- 846 Bing Jian, Baba C Vemuri, Evren Özarslan, Paul R Carney, and Thomas H Mareci. A novel tensor distribution  
847 model for the diffusion-weighted MR signal. *NeuroImage*, 37(1):164–176, 2007. ISSN 1053-8119. URL  
848 <https://doi.org/10.1016/j.neuroimage.2007.03.074>.
- 849 Boris Keil, James N. Blau, Stephan Biber, Philipp Hoecht, Veneta Tountcheva, Kawin Setsompop, Christina  
850 Triantafyllou, and Lawrence L. Wald. A 64-channel 3T array coil for accelerated brain MRI. *Magnetic Resonance*  
851 *in Medicine*, 70(1):248–258, 2013. ISSN 0740-3194. URL <https://doi.org/10.1002/mrm.24427>.
- 852 Elias Kellner, Bibek Dhital, Valerij G. Kiselev, and Marco Reiser. Gibbs-ringing artifact removal based on local  
853 subvoxel-shifts. *Magnetic resonance in medicine*, 76(5):1574–1581, 2016. ISSN 0740-3194. URL  
854 <https://doi.org/10.1002/mrm.26054>.
- 855 Shadab Khan, Lana Vasung, Bahram Marami, Caitlin K. Rollins, Onur Afacan, Cynthia M. Ortinau, Edward Yang,  
856 Simon K. Warfield, and Ali Gholipour. Fetal brain growth portrayed by a spatiotemporal diffusion tensor MRI  
857 atlas computed from in utero images. *NeuroImage*, 185:593–608, 2019. ISSN 1053-8119. URL  
858 <https://doi.org/10.1016/j.neuroimage.2018.08.030>.
- 859 Daeun Kim, Eamon K. Doyle, Jessica L. Wisnowski, Joong Hee Kim, and Justin P. Haldar. Diffusion-relaxation  
860 correlation spectroscopic imaging: A multidimensional approach for probing microstructure. *Magnetic Resonance*  
861 *in Medicine*, 78(6):2236–2249, 2017. ISSN 0740-3194. URL <https://doi.org/10.1002/mrm.26629>.



- 862 B. F. Kingsbury. The extent of the floor-plate of his and its significance. *Journal of Comparative Neurology*, 32(1):  
863 113–135, 1920. ISSN 0021-9967. URL <https://doi.org/10.1002/cne.900320106>.
- 864 M. Kleinnijenhuis, V. Zerbi, B. Küsters, C. H. Slump, M. Barth, and A. M. van Cappellen van Walsum.  
865 Layer-specific diffusion weighted imaging in human primary visual cortex in vitro. *Cortex*, 49(9):2569–2582, 2013.  
866 URL <https://doi.org/10.1016/j.cortex.2012.11.015>.
- 867 M. Kleinnijenhuis, T. van Mourik, D. G. Norris, D. J. Ruiter, A. M. van Cappellen van Walsum, and M. Barth.  
868 Diffusion tensor characteristics of gyrencephaly using high resolution diffusion MRI in vivo at 7T. *NeuroImage*,  
869 109:378–387, 2015. URL <https://doi.org/10.1016/j.neuroimage.2015.01.001>.
- 870 Martin A Koch and Jürgen Finsterbusch. Compartment size estimation with double wave vector diffusion-weighted  
871 imaging. *Magnetic Resonance in Medicine: An Official Journal of the International Society for Magnetic*  
872 *Resonance in Medicine*, 60(1):90–101, 2008. ISSN 0740-3194. URL <https://doi.org/10.1002/mrm.21514>.
- 873 ME Komlosh, F Horkay, RZ Freidlin, U Nevo, Yaniv Assaf, and PJ Basser. Detection of microscopic anisotropy in  
874 gray matter and in a novel tissue phantom using double pulsed gradient spin echo MR. *Journal of magnetic*  
875 *resonance*, 189(1):38–45, 2007. ISSN 1090-7807. URL <https://doi.org/10.1016/j.jmr.2007.07.003>.
- 876 Michal E. Komlosh, Dan Benjamini, Elizabeth B. Hutchinson, Sarah King, Margalit Haber, Alexandru V. Avram,  
877 Lynne A. Holtzclaw, Abhishek Desai, Carlo Pierpaoli, and Peter J. Basser. Using double pulsed-field gradient MRI  
878 to study tissue microstructure in traumatic brain injury (TBI). *Microporous and Mesoporous Materials*, 269:  
879 156–159, 2018. ISSN 1387-1811. URL <https://doi.org/10.1016/j.micromeso.2017.05.030>.
- 880 Björn Lampinen, Ariadne Zampeli, Isabella M. Björkman-Burtscher, Filip Szczepankiewicz, Kristina Källén, Maria  
881 Compagno Strandberg, and Markus Nilsson. Tensor-valued diffusion MRI differentiates cortex and white matter in  
882 malformations of cortical development associated with epilepsy. *Epilepsia*, 61(8):1701–1713, 2020. ISSN 0013-9580.  
883 URL <https://doi.org/10.1111/epi.16605>.
- 884 Trygve B. Leergaard, Nathan S. White, Alex de Crespigny, Ingeborg Bolstad, Helen D’Arceuil, Jan G. Bjaalie, and  
885 Anders M. Dale. Quantitative Histological Validation of Diffusion MRI Fiber Orientation Distributions in the Rat  
886 Brain. *PLOS ONE*, 5(1):e8595, 2010. URL <https://doi.org/10.1371/journal.pone.0008595>.
- 887 J. Lefèvre and J. F. Mangin. A reaction-diffusion model of human brain development. *PLoS Computational Biology*,  
888 6(4), 2010. URL <https://doi.org/10.1371/journal.pcbi.1000749>.
- 889 C. W. U. Leuze, A. Anwander, P. L. Bazin, B. Dhital, C. Stüber, K. Reimann, S. Geyer, and R. Turner.  
890 Layer-specific intracortical connectivity revealed with diffusion MRI. *Cerebral Cortex*, 24(2):328–339, 2014. URL  
891 <https://doi.org/10.1093/cercor/bhs311>.
- 892 Jeff W. Lichtman and Winfried Denk. The Big and the Small: Challenges of Imaging the Brain’s Circuits. *Science*,  
893 334(6056):618, 2011. URL <https://doi.org/10.1126/science.1209168>.
- 894 Chunlei Liu, Roland Bammer, Burak Acar, and Michael E. Moseley. Characterizing non-gaussian diffusion by using  
895 generalized diffusion tensors. *Magnetic Resonance in Medicine*, 51(5):924–937, 2004. ISSN 0740-3194. URL  
896 <https://doi.org/10.1002/mrm.20071>.

- 897 H. Lundell, M. Nilsson, T. B. Dyrby, G. J. M. Parker, P. L. Hubbard Cristinacce, F. L. Zhou, D. Topgaard, and  
898 S. Lasič. Multidimensional diffusion MRI with spectrally modulated gradients reveals unprecedented  
899 microstructural detail. *Scientific Reports*, 9(1):9026, 2019. ISSN 2045-2322. URL  
900 <https://doi.org/10.1038/s41598-019-45235-7>.
- 901 Kulam Najmudeen Magdoom, Sinisa Pajevic, Gasbarra Dario, and Peter J. Basser. A new framework for MR  
902 diffusion tensor distribution. *Scientific Reports*, 11(1):2766, 2021. ISSN 2045-2322. URL  
903 <https://doi.org/10.1038/s41598-021-81264-x>.
- 904 Debra McGivney, Anagha Deshmane, Yun Jiang, Dan Ma, Chaitra Badve, Andrew Sloan, Vikas Gulani, and Mark  
905 Griswold. Bayesian estimation of multicomponent relaxation parameters in magnetic resonance fingerprinting.  
906 *Magnetic resonance in medicine*, 80(1):159–170, 2018. ISSN 0740-3194. URL  
907 <http://doi.org/10.1002/mrm.27017>.
- 908 Robert C. McKinstry, Amit Mathur, Jeffrey H. Miller, Alpay Ozcan, Abraham Z. Snyder, Georgia L. Schefft,  
909 C. Robert Almli, Shelly I. Shiran, Thomas E. Conturo, and Jeffrey J. Neil. Radial Organization of Developing  
910 Preterm Human Cerebral Cortex Revealed by Non-invasive Water Diffusion Anisotropy MRI. *Cerebral Cortex*, 12  
911 (12):1237–1243, 2002. ISSN 1047-3211. URL <https://doi.org/10.1093/cercor/12.12.1237>.
- 912 Jennifer A. McNab, Saâd Jbabdi, Sean C. L. Deoni, Gwenaëlle Douaud, Timothy E. J. Behrens, and Karla L. Miller.  
913 High resolution diffusion-weighted imaging in fixed human brain using diffusion-weighted steady state free  
914 precession. *NeuroImage*, 46(3):775–785, 2009. ISSN 1053-8119. URL  
915 <https://doi.org/10.1016/j.neuroimage.2009.01.008>.
- 916 Jennifer A. McNab, Jonathan R. Polimeni, Ruopeng Wang, Jean C. Augustinack, Kyoko Fujimoto, Allison Stevens,  
917 Thomas Janssens, Reza Farivar, Rebecca D. Folkert, Wim Vanduffel, and Lawrence L. Wald. Surface based  
918 analysis of diffusion orientation for identifying architectonic domains in the in vivo human cortex. *NeuroImage*, 69:  
919 87–100, 2013. ISSN 1053-8119. URL <https://doi.org/10.1016/j.neuroimage.2012.11.065>.
- 920 K. L. Miller, C. J. Stagg, G. Douaud, S. Jbabdi, S. M. Smith, T. E. J. Behrens, M. Jenkinson, S. A. Chance, M. M.  
921 Esiri, N. L. Voets, N. Jenkinson, T. Z. Aziz, M. R. Turner, H. Johansen-Berg, and J. A. McNab. Diffusion imaging  
922 of whole, post-mortem human brains on a clinical MRI scanner. *NeuroImage*, 57(1):167–181, 2011. URL  
923 <https://doi.org/10.1016/j.neuroimage.2011.03.070>.
- 924 Partha P Mitra. Multiple wave-vector extensions of the NMR pulsed-field-gradient spin-echo diffusion measurement.  
925 *Physical Review B*, 51(21):15074, 1995. URL <https://doi.org/10.1103/physrevb.51.15074>.
- 926 Robert V. Mulkern, Hakon Gudbjartsson, Carl-Fredrik Westin, Hale Pinar Zengingonul, Werner Gartner, Charles  
927 R. G. Guttman, Richard L. Robertson, Walid Kyriakos, Richard Schwartz, David Holtzman, Ferenc A. Jolesz,  
928 and Stephan E. Maier. Multi-component apparent diffusion coefficients in human brain†. *NMR in Biomedicine*, 12  
929 (1):51–62, 1999. ISSN 0952-3480. URL  
930 [https://doi.org/10.1002/\(SICI\)1099-1492\(199902\)12:1<51::AID-NBM546>3.0.CO;2-E](https://doi.org/10.1002/(SICI)1099-1492(199902)12:1<51::AID-NBM546>3.0.CO;2-E).
- 931 Z. Nagy, D. C. Alexander, D. L. Thomas, N. Weiskopf, and M. I. Sereno. Using High Angular Resolution Diffusion  
932 Imaging Data to Discriminate Cortical Regions. *PLoS ONE*, 8(5), 2013. URL  
933 <https://doi.org/10.1371/journal.pone.0063842>.

- 934 R. Nieuwenhuys. The myeloarchitectonic studies on the human cerebral cortex of the Vogt-Vogt school, and their  
935 significance for the interpretation of functional neuroimaging data. *Brain Structure and Function*, 218(2):303–352,  
936 2013. URL <https://doi.org/10.1007/s00429-012-0460-z>.
- 937 Markus Nilsson, Jimmy Lätt, Danielle van Westen, Sara Brockstedt, Samo Lasič, Freddy Ståhlberg, and Daniel  
938 Topgaard. Noninvasive mapping of water diffusional exchange in the human brain using filter-exchange imaging.  
939 *Magnetic Resonance in Medicine*, 69(6):1572–1580, 2013. URL <https://doi.org/10.1002/mrm.24395>.
- 940 Markus Nilsson, Filip Szczepankiewicz, Jan Brabec, Marie Taylor, Carl-Fredrik Westin, Alexandra Golby, Danielle  
941 van Westen, and Pia C. Sundgren. Tensor-valued diffusion mri in under 3 minutes: an initial survey of microscopic  
942 anisotropy and tissue heterogeneity in intracranial tumors. *Magnetic Resonance in Medicine*, 83(2):608–620, 2020.  
943 URL <https://doi.org/10.1002/mrm.27959>.
- 944 Cheryl A. Olman, Noam Harel, David A. Feinberg, Sheng He, Peng Zhang, Kamil Ugurbil, and Essa Yacoub.  
945 Layer-Specific fMRI Reflects Different Neuronal Computations at Different Depths in Human V1. *PLOS ONE*, 7  
946 (3):e32536, 2012. URL <https://doi.org/10.1371/journal.pone.0032536>.
- 947 Sinisa Pajevic, Akram Aldroubi, and Peter J Basser. A continuous tensor field approximation of discrete dt-mri data  
948 for extracting microstructural and architectural features of tissue. *Journal of magnetic resonance*, 154(1):85–100,  
949 2002. URL <https://doi.org/10.1006/jmre.2001.2452>.
- 950 Ofer Pasternak, Nir Sochen, Yaniv Gur, Nathan Intrator, and Yaniv Assaf. Free water elimination and mapping from  
951 diffusion MRI. *Magnetic Resonance in Medicine: An Official Journal of the International Society for Magnetic  
952 Resonance in Medicine*, 62(3):717–730, 2009. ISSN 0740-3194. URL <https://doi.org/10.1002/mrm.22055>.
- 953 Muriel Perrin, Cyril Poupon, Bernard Rieul, Patrick Leroux, André Constantinesco, Jean-François Mangin, and  
954 Denis LeBihan. Validation of Q-ball imaging with a diffusion fibre-crossing phantom on a clinical scanner.  
955 *Philosophical Transactions of the Royal Society B: Biological Sciences*, 360(1457):881–891, 2005. URL  
956 <https://doi.org/10.1098/rstb.2005.1650>.
- 957 Carl CH Petersen. The functional organization of the barrel cortex. *Neuron*, 56(2):339–355, 2007. ISSN 0896-6273.  
958 URL <https://doi.org/10.1016/j.neuron.2007.09.017>.
- 959 C Pierpaoli, L Walker, MO Irfanoglu, A Barnett, P Basser, LC Chang, C Koay, S Pajevic, G Rohde, and J Sarlls.  
960 Tortoise: an integrated software package for processing of diffusion mri data. In *18th Scientific Meeting of the  
961 International Society for Magnetic Resonance in Medicine*, page 1597, 2010.
- 962 Carlo Pierpaoli and Peter J. Basser. Toward a quantitative assessment of diffusion anisotropy. *Magnetic Resonance  
963 in Medicine*, 36(6):893–906, 1996. ISSN 0740-3194. URL <https://doi.org/10.1002/mrm.1910360612>.
- 964 Carolin M Pirk, Pedro A Gómez, Ilona Lipp, Guido Buonincontri, Miguel Molina-Romero, Anjany Sekuboyina, Diana  
965 Waldmannstetter, Jonathan Dannenberg, Sebastian Endt, and Alberto Merola. Deep learning-based parameter  
966 mapping for joint relaxation and diffusion tensor mr fingerprinting. In *Medical Imaging with Deep Learning*, pages  
967 638–654. PMLR, 2020. ISBN 2640-3498.
- 968 Michael Prange and Yi-Qiao Song. Quantifying uncertainty in NMR T2 spectra using Monte Carlo inversion. *Journal  
969 of Magnetic Resonance*, 196(1):54–60, 2009. ISSN 1090-7807. URL  
970 <https://doi.org/10.1016/j.jmr.2008.10.008>.

- 971 Alexis Reymbaut, Jeffrey Critchley, Giuliana Durighel, Tim Sprenger, Michael Sughrue, Karin Bryskhe, and Daniel  
972 Topgaard. Toward nonparametric diffusion- characterization of crossing fibers in the human brain. *Magnetic*  
973 *Resonance in Medicine*, 85(5):2815–2827, 2021. ISSN 0740-3194. URL <https://doi.org/10.1002/mrm.28604>.
- 974 Itamar Ronen, Ece Ercan, and Andrew Webb. Axonal and glial microstructural information obtained with  
975 diffusion-weighted magnetic resonance spectroscopy at 7T. *Frontiers in Integrative Neuroscience*, 7(13), 2013. ISSN  
976 1662-5145. URL <https://doi.org/10.3389/fnint.2013.00013>.
- 977 John Rubenstein and Pasko Rakic. *Neural Circuit and Cognitive Development: Comprehensive Developmental*  
978 *Neuroscience*. Academic Press, 2020. ISBN 0128144122.
- 979 Kadharbatcha S. Saleem, Alexandru V. Avram, Daniel Glen, Cecil Chern-Chyi Yen, Frank Q. Ye, Michal Komlosch,  
980 and Peter J. Basser. High-resolution mapping and digital atlas of subcortical regions in the macaque monkey based  
981 on matched MAP-MRI and histology. *NeuroImage*, 245:118759, 2021. ISSN 1053-8119. URL  
982 <https://doi.org/10.1016/j.neuroimage.2021.118759>.
- 983 A. K. Seehaus, A. Roebroek, O. Chiry, D. S. Kim, I. Ronen, H. Bratzke, R. Goebel, and R. A. W. Galuske.  
984 Histological validation of DW-MRI tractography in human postmortem tissue. *Cerebral Cortex*, 23(2):442–450,  
985 2013. URL <https://doi.org/10.1093/cercor/bhs036>.
- 986 Arne Seehaus, Alard Roebroek, Matteo Bastiani, Lúcia Fonseca, Hansjürgen Bratzke, Nicolás Lori, Anna Vilanova,  
987 Rainer Goebel, and Ralf Galuske. Histological validation of high-resolution dti in human post mortem tissue.  
988 *Frontiers in Neuroanatomy*, 9(98), 2015. ISSN 1662-5129. URL <https://doi.org/10.3389/fnana.2015.00098>.
- 989 Kawin Setsompop, Qiuyun Fan, Jason Stockmann, Berkin Bilgic, Susie Huang, Stephen F. Cauley, Aapo  
990 Nummenmaa, Fuyixue Wang, Yogesh Rathi, Thomas Witzel, and Lawrence L. Wald. High-resolution in vivo  
991 diffusion imaging of the human brain with generalized slice dithered enhanced resolution: Simultaneous multislice  
992 (gSlider-SMS). *Magnetic Resonance in Medicine*, 79(1):141–151, 2018. ISSN 0740-3194. URL  
993 <https://doi.org/10.1002/mrm.26653>.
- 994 Alexander Shapson-Coe, Michał Januszewski, Daniel R. Berger, Art Pope, Yuelong Wu, Tim Blakely, Richard L.  
995 Schalek, Peter Li, Shuohong Wang, Jeremy Maitin-Shepard, Neha Karlupia, Sven Dorkenwald, Evelina Sjostedt,  
996 Laramie Leavitt, Dongil Lee, Luke Bailey, Angerica Fitzmaurice, Rohin Kar, Benjamin Field, Hank Wu, Julian  
997 Wagner-Carena, David Aley, Joanna Lau, Zudi Lin, Donglai Wei, Hanspeter Pfister, Adi Peleg, Viren Jain, and  
998 Jeff W. Lichtman. A connectomic study of a petascale fragment of human cerebral cortex. *bioRxiv*, page  
999 2021.05.29.446289, 2021. URL <https://doi.org/10.1101/2021.05.29.446289>.
- 1000 Yiqiao Song, Ina Ly, Qiuyun Fan, Aapo Nummenmaa, Maria Martinez-Lage, William T. Curry, Jorg Dietrich,  
1001 Deborah A. Forst, Bruce R. Rosen, Susie Y. Huang, and Elizabeth R. Gerstner. Measurement of Full Diffusion  
1002 Tensor Distribution Using High-Gradient Diffusion MRI and Applications in Diffuse Gliomas. *Frontiers in Physics*,  
1003 10, 2022. ISSN 2296-424X. URL <https://doi.org/10.3389/fphy.2022.813475>.
- 1004 Greg J. Stanisz, Graham A. Wright, R. Mark Henkelman, and Aaron Szafer. An analytical model of restricted  
1005 diffusion in bovine optic nerve. *Magnetic Resonance in Medicine*, 37(1):103–111, 1997. ISSN 0740-3194. URL  
1006 <https://doi.org/10.1002/mrm.1910370115>.
- 1007 E. O. Stejskal and J. E. Tanner. Spin diffusion measurements: Spin echoes in the presence of a time-dependent field  
1008 gradient. *The Journal of Chemical Physics*, 42(1):288–292, 1965. URL <https://doi.org/10.1063/1.1695690>.

- 1009 Filip Szczepankiewicz, Danielle van Westen, Elisabet Englund, Carl-Fredrik Westin, Freddy Ståhlberg, Jimmy Lätt,  
1010 Pia C Sundgren, and Markus Nilsson. The link between diffusion MRI and tumor heterogeneity: Mapping cell  
1011 eccentricity and density by diffusional variance decomposition (DIVIDE). *NeuroImage*, 142:522–532, 2016. ISSN  
1012 1053-8119. URL <https://doi.org/10.1016/j.neuroimage.2016.07.038>.
- 1013 E. Takahashi, G. Dai, G. D. Rosen, R. Wang, K. Ohki, R. D. Folkerth, A. M. Galaburda, V. J. Wedeen, and P. E.  
1014 Grant. Developing neocortex organization and connectivity in cats revealed by direct correlation of diffusion  
1015 tractography and histology. *Cerebral Cortex*, 21(1):200–211, 2011. URL  
1016 <https://doi.org/10.1093/cercor/bhq084>.
- 1017 Chantal M. W. Tax, Tom Dela Haije, Andrea Fuster, Carl-Fredrik Westin, Max A. Viergever, Luc Florack, and  
1018 Alexander Leemans. Sheet Probability Index (SPI): Characterizing the geometrical organization of the white  
1019 matter with diffusion MRI. *NeuroImage*, 142:260–279, 2016. ISSN 1053-8119. URL  
1020 <https://doi.org/10.1016/j.neuroimage.2016.07.042>.
- 1021 Chantal M. W. Tax, Carl-Fredrik Westin, Tom Dela Haije, Andrea Fuster, Max A. Viergever, Evan Calabrese, Luc  
1022 Florack, and Alexander Leemans. Quantifying the brain’s sheet structure with normalized convolution. *Medical  
1023 Image Analysis*, 39:162–177, 2017. ISSN 1361-8415. URL <https://doi.org/10.1016/j.media.2017.03.007>.
- 1024 Daniel Topgaard. Multidimensional diffusion MRI. *Journal of Magnetic Resonance*, 275:98–113, 2017. ISSN  
1025 1090-7807. URL <https://doi.org/10.1016/j.jmr.2016.12.007>.
- 1026 J. D. Tournier, F. Calamante, D. G. Gadian, and A. Connelly. Direct estimation of the fiber orientation density  
1027 function from diffusion-weighted mri data using spherical deconvolution. *NeuroImage*, 23(3):1176–1185, 2004. URL  
1028 <https://doi.org/10.1016/j.neuroimage.2004.07.037>.
- 1029 D. S. Tuch, T. G. Reese, M. R. Wiegell, N. Makris, J. W. Belliveau, and J. Van Wedeen. High angular resolution  
1030 diffusion imaging reveals intravoxel white matter fiber heterogeneity. *Magnetic Resonance in Medicine*, 48(4):  
1031 577–582, 2002. URL <https://doi.org/10.1002/mrm.10268>.
- 1032 Alan Mathison Turing. The chemical basis of morphogenesis. *Philosophical Transactions of the Royal Society of  
1033 London. Series B, Biological Sciences*, 237(641):37–72, 1952. URL  
1034 <https://doi.org/doi:10.1098/rstb.1952.0012>.
- 1035 K. Uğurbil, J. Xu, E. J. Auerbach, S. Moeller, A. T. Vu, J. M. Duarte-Carvajalino, C. Lenglet, X. Wu, S. Schmitter,  
1036 P. F. Van de Moortele, J. Strupp, G. Sapiro, F. De Martino, D. Wang, N. Harel, M. Garwood, L. Chen, D. A.  
1037 Feinberg, S. M. Smith, K. L. Miller, S. N. Sotiropoulos, S. Jbabdi, J. L. R. Andersson, T. E. J. Behrens, M. F.  
1038 Glasser, D. C. Van Essen, and E. Yacoub. Pushing spatial and temporal resolution for functional and diffusion  
1039 MRI in the Human Connectome Project. *NeuroImage*, 80:80–104, 2013. URL  
1040 <https://doi.org/10.1016/j.neuroimage.2013.05.012>.
- 1041 D. C. Van Essen. A tension-based theory of morphogenesis and compact wiring in the central nervous system.  
1042 *Nature*, 385(6614):313–318, 1997. URL <https://doi.org/10.1038/385313a0>.
- 1043 L. Vasung, H. Huang, N. Jovanov-Milošević, M. Pletikos, S. Mori, and I. Kostović. Development of axonal pathways  
1044 in the human fetal fronto-limbic brain: Histochemical characterization and diffusion tensor imaging. *Journal of  
1045 Anatomy*, 217(4):400–417, 2010. URL <https://doi.org/10.1111/j.1469-7580.2010.01260.x>.

- 1046 Jelle Veraart, Dmitry S. Novikov, Daan Christiaens, Benjamin Ades-aron, Jan Sijbers, and Els Fieremans. Denoising  
1047 of diffusion MRI using random matrix theory. *NeuroImage*, 142:394–406, 2016. ISSN 1053-8119. URL  
1048 <https://doi.org/10.1016/j.neuroimage.2016.08.016>.
- 1049 O. Vogt. Die myeloarchitektonische Felderung des menschlichen Stirnhirns. *J Psychol Neurol*, 15:221–232, 1910.
- 1050 Fuyixue Wang, Zijing Dong, Qiyuan Tian, Congyu Liao, Qiuyun Fan, W Scott Hoge, Boris Keil, Jonathan R Polimeni,  
1051 Lawrence L Wald, Susie Y Huang, et al. In vivo human whole-brain Connectom diffusion MRI dataset at 760  $\mu\text{m}$   
1052 isotropic resolution. *Scientific Data*, 8(1):1–12, 2021. URL <https://doi.org/10.1038/s41597-021-00904-z>.
- 1053 Van J. Wedeen, Douglas L. Rosene, Ruopeng Wang, Guangping Dai, Farzad Mortazavi, Patric Hagmann, Jon H.  
1054 Kaas, and Wen-Yih I. Tseng. The Geometric Structure of the Brain Fiber Pathways. *Science*, 335(6076):1628,  
1055 2012. URL <https://doi.org/10.1126/science.1215280>.
- 1056 C. F. Westin, H. Knutsson, O. Pasternak, F. Szczepankiewicz, E. Ozarslan, D. van Westen, C. Mattisson, M. Bogren,  
1057 L. J. O’Donnell, M. Kubicki, D. Topgaard, and M. Nilsson. Q-space trajectory imaging for multidimensional  
1058 diffusion MRI of the human brain. *Neuroimage*, 135:345–62, 2016. ISSN 1095-9572 (Electronic) 1053-8119  
1059 (Linking). URL <https://doi.org/10.1016/j.neuroimage.2016.02.039>.
- 1060 Essa Yacoub, Noam Harel, and Kâmil Uğurbil. High-field fMRI unveils orientation columns in humans. *Proceedings*  
1061 *of the National Academy of Sciences*, 105(30):10607–10612, 2008. URL  
1062 <https://doi.org/10.1073/pnas.0804110105>.
- 1063 H. Zhang, T. Schneider, C. A. Wheeler-Kingshott, and D. C. Alexander. NODDI: Practical in vivo neurite  
1064 orientation dispersion and density imaging of the human brain. *NeuroImage*, 61(4):1000–1016, 2012. URL  
1065 <https://doi.org/10.1016/j.neuroimage.2012.03.072>.
- 1066 Meng-Qi Zhang, Luo Zhou, Qian-Fang Deng, Yuan-Yuan Xie, Ti-Qiao Xiao, Yu-Ze Cao, Ji-Wen Zhang, Xu-Meng  
1067 Chen, Xian-Zhen Yin, and Bo Xiao. Ultra-high-resolution 3D digitalized imaging of the cerebral angioarchitecture  
1068 in rats using synchrotron radiation. *Scientific Reports*, 5(1):14982, 2015. ISSN 2045-2322. URL  
1069 <https://doi.org/10.1038/srep14982>.
- 1070 Evren Özarslan and Thomas H. Mareci. Generalized diffusion tensor imaging and analytical relationships between  
1071 diffusion tensor imaging and high angular resolution diffusion imaging. *Magnetic Resonance in Medicine*, 50(5):  
1072 955–965, 2003. ISSN 0740-3194. URL <https://doi.org/10.1002/mrm.10596>.
- 1073 Evren Özarslan, Cheng Guan Koay, Timothy M Shepherd, Michal E Komlosh, M Okan İrfanoğlu, Carlo Pierpaoli,  
1074 and Peter J Basser. Mean apparent propagator (MAP) MRI: a novel diffusion imaging method for mapping tissue  
1075 microstructure. *NeuroImage*, 78:16–32, 2013. ISSN 1053-8119. URL  
1076 <https://doi.org/10.1016/j.neuroimage.2013.04.016>.

## 1077 Figure captions

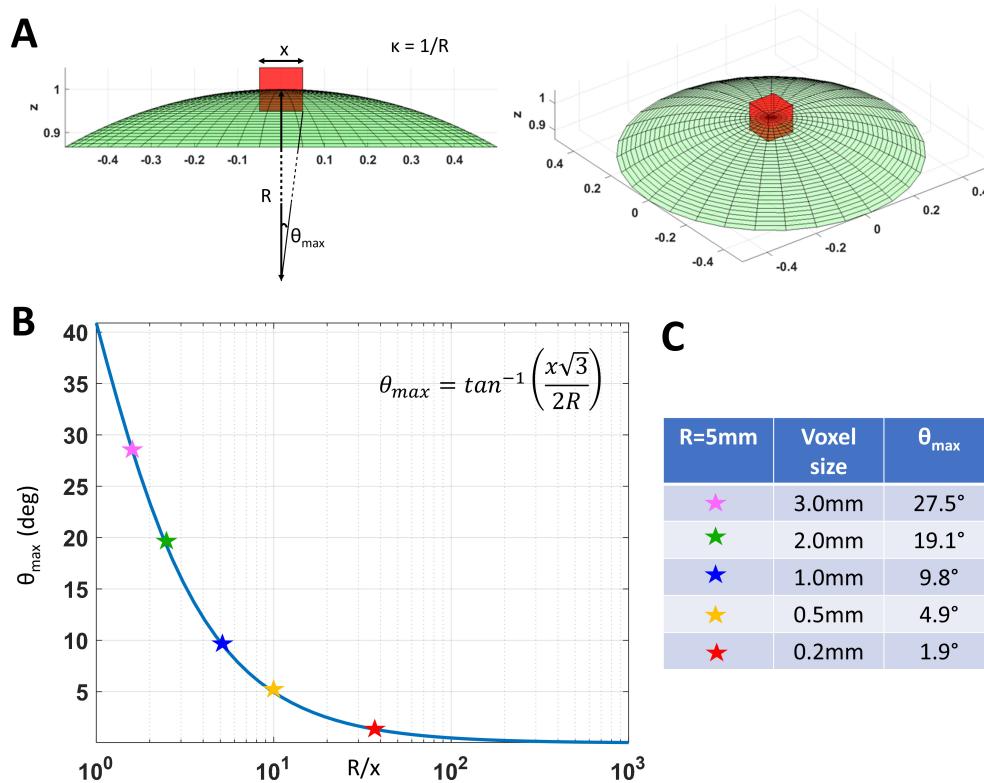

**Figure 1.** **A.** As we decrease the voxel size,  $x$ , relative to the radius of curvature of the tissue (e.g., due to cortical folding),  $R$ , the intravoxel orientational variance of the continuously varying microstructural reference frame also decreases. For a voxel with an arbitrary orientation relative to the underlying microstructure, the range of intravoxel orientational variation due to tissue curvature is  $\pm\theta_{max}$ . **B.** The value of  $\theta_{max}$  decreases rapidly at low spatial resolutions,  $R/x$ , but changes very slowly at higher spatial resolutions,  $R/x$ . **C.** A quantitative comparison of  $\theta_{max}$  at different voxel sizes assuming a cortical radius of curvature  $R = 5\text{mm}$  shows the significant reduction in intravoxel orientational variance due to the effects of anatomical curvature at high spatial resolutions.

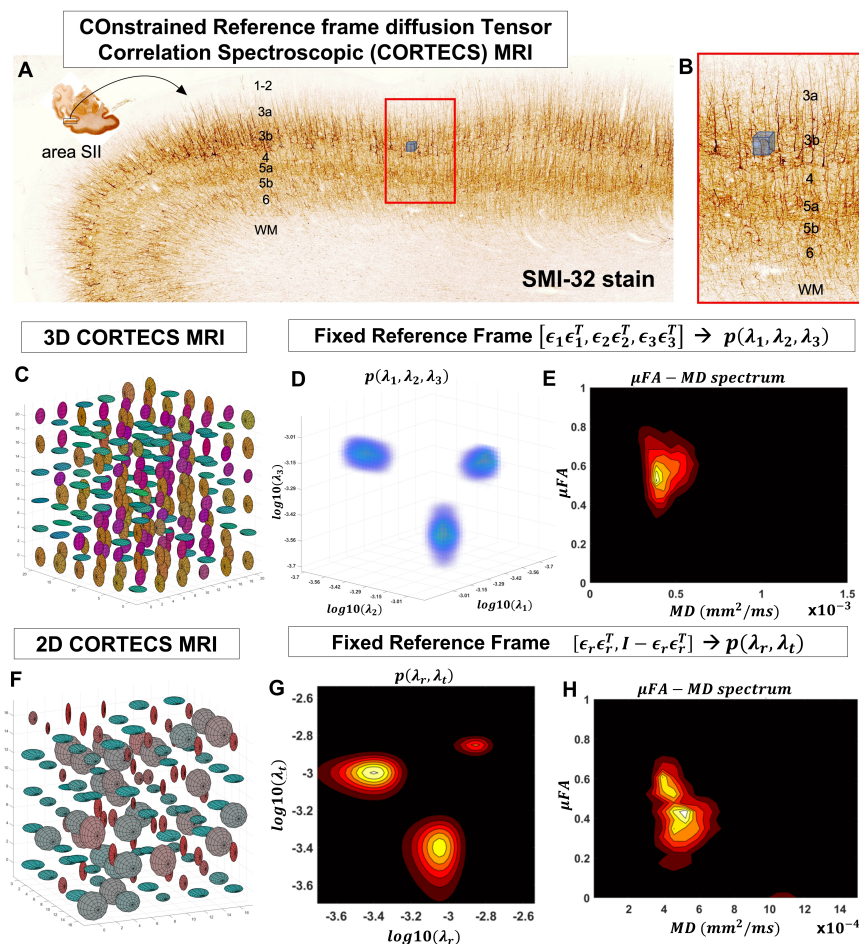

**Figure 2.** At a mesoscopic length scale cortical cyto- and myeloarchitecture is organized preferentially along the axes of an orthogonal frame of reference (**A**). If the dMRI spatial resolution is sufficiently small (**Fig. 1**) we can measure DTDs efficiently using the constraints of the CORTECS MRI framework (**B**). If we constrain all microscopic diffusion tensors to have the same principal axes of diffusion (**C**) we can quantify the DTD as the 3D correlation spectrum of the corresponding principal diffusivities (**D**). If the microarchitecture varies along a single radial orientation we can further constrain the DTD to contain only axisymmetric tensors (**F**) and quantify the 2D correlation spectrum of the corresponding radial and tangential diffusivities. We can also quantify the shape-size (i.e., microscopic FA-MD) correlation spectra of microscopic tensors from the 3D (**E**) or 2D (**H**) constrained reference frame DTDs (cDTDs).





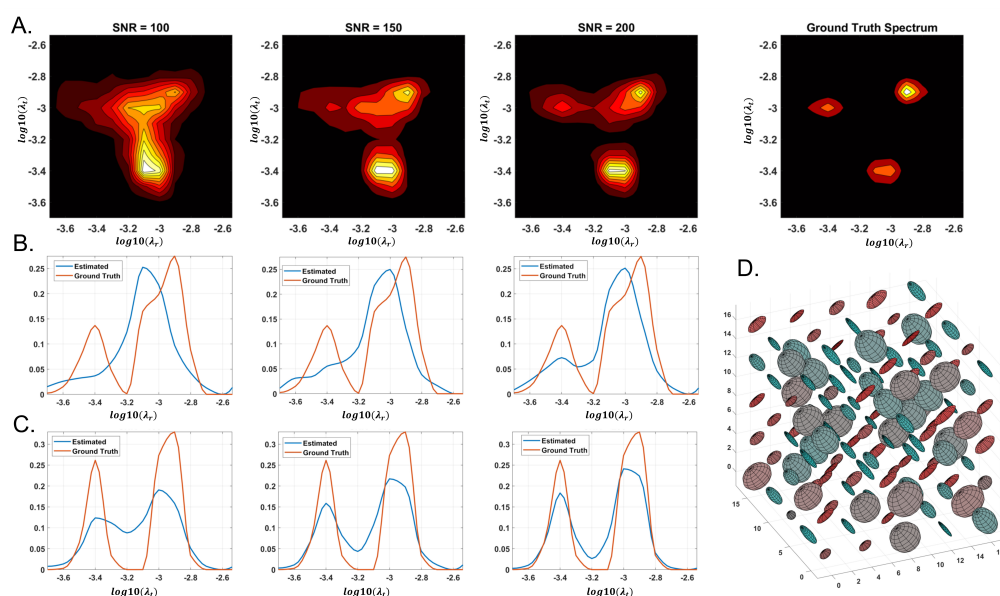

**Figure 4.** Monte-Carlo simulation results illustrating the accuracy and numerical stability of the 2D cDTD reconstruction as a function of SNR. **A:** Log-log plots of mean normalized 2D cDTD correlation spectra of principal diffusivities reconstructed at different SNR levels. **B,C:** Log plots of mean normalized 1D marginal distributions derived from the 2D cDTDs in the top row. **D:** A numerically simulated illustration of an ensemble of diffusion tensors described by the ground truth 2D cDTD.

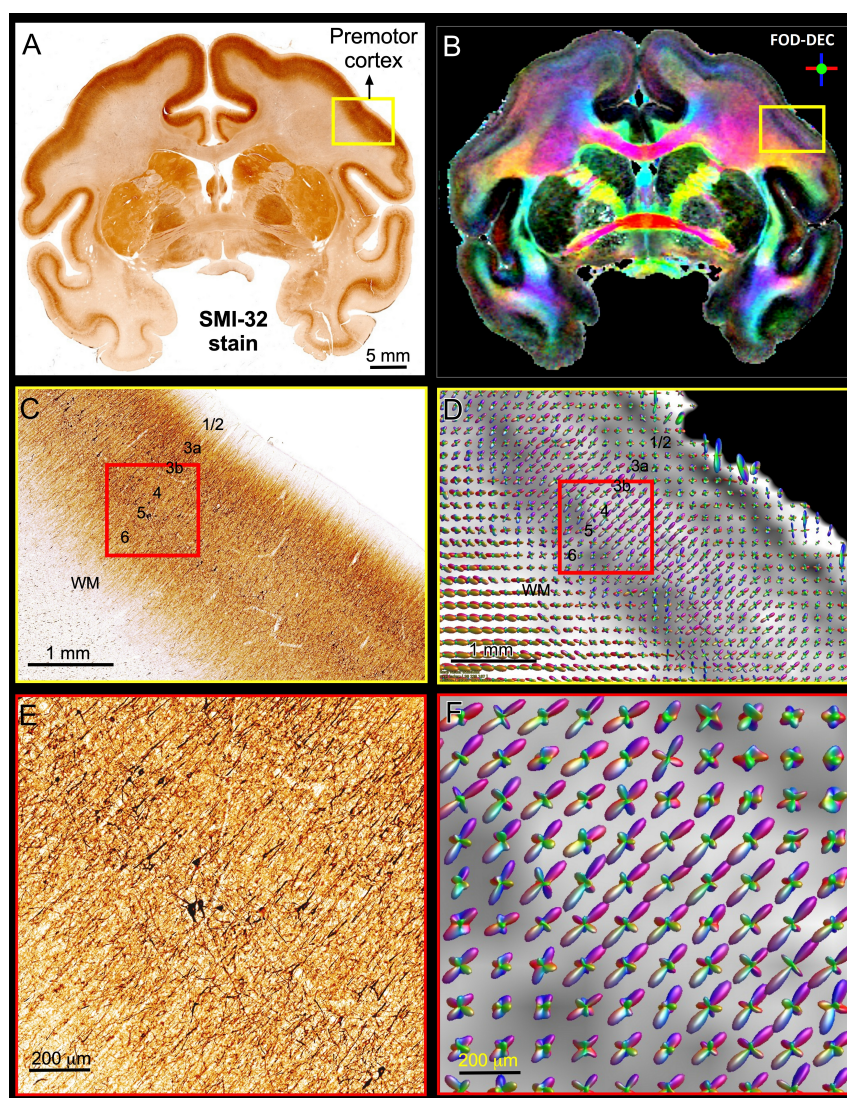

**Figure 5.** Views of the brain anatomy at the macroscopic scale in a coronal tissue section stained with SMI-32 (A) and the FOD-DEC image in a matched MRI slice (B) showing the dependence of the principal diffusion direction on the cortical folding geometry. C and D: Enlarged views of the mesoscopic scale of the histological image and FOD glyphs corresponding to the yellow outlines in A and B, respectively. The cortical architecture shows a laminar pattern of radially coherent cell processes with different densities (labeled cortical layers). E and F: Enlarged views of the histological image and FOD glyphs corresponding to the red outline in C and D. The locally coherent alignment of FOD peaks (F) matches the microstructural tissue architecture comprising radial and tangential cell processes (E).

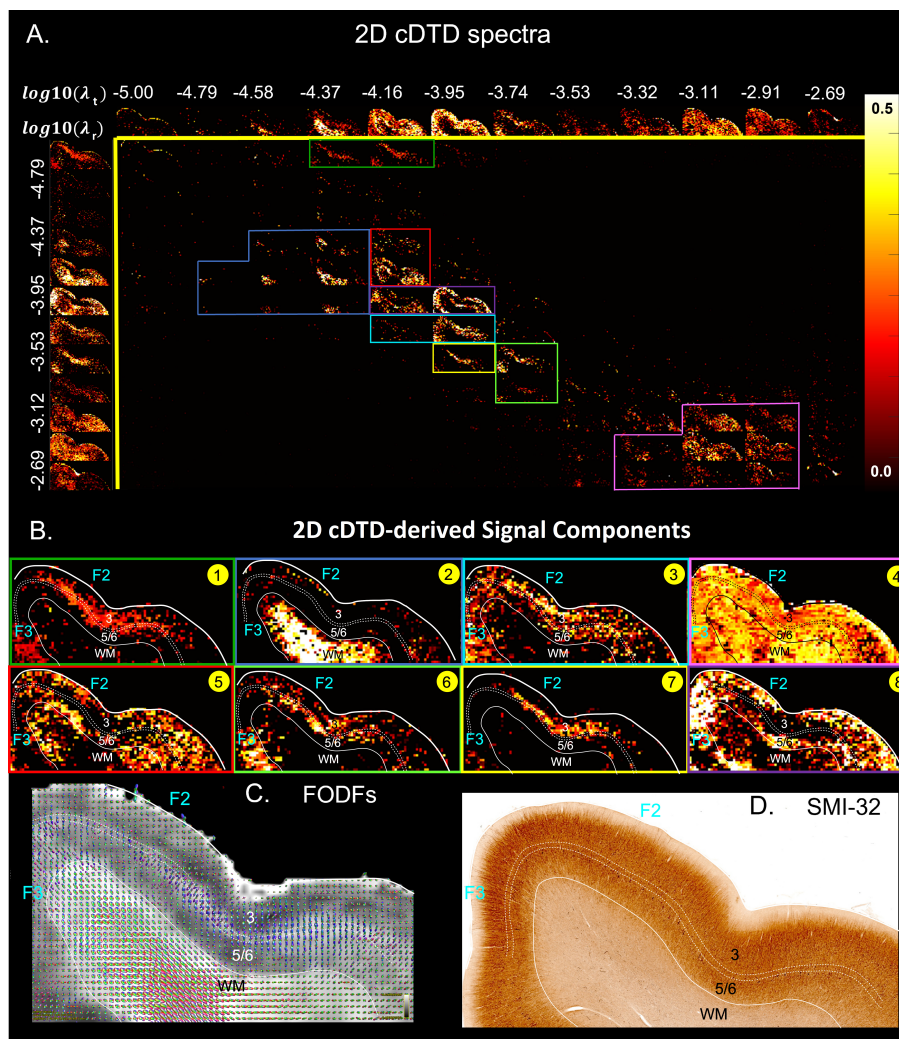

**Figure 6.** **A.** Spectral component maps of normalized 2D correlation spectra of radial and tangential diffusivities in a section of the cortex from **Fig 5A**. **Top row:** Spectral component maps of the normalized 1D marginal distribution of tangential diffusivity,  $\lambda_t$ ; **Left column:** Spectral component maps of the normalized 1D marginal distribution of radial diffusivity,  $\lambda_r$ . **B.** Tissue component maps derived by integrating the 2D cDTD spectral components over empirically defined spectral regions of interest delineated with different colors show good specificity to cortical layers. **C.** Corresponding FODs. **D.** Corresponding SMI-32 stained section.

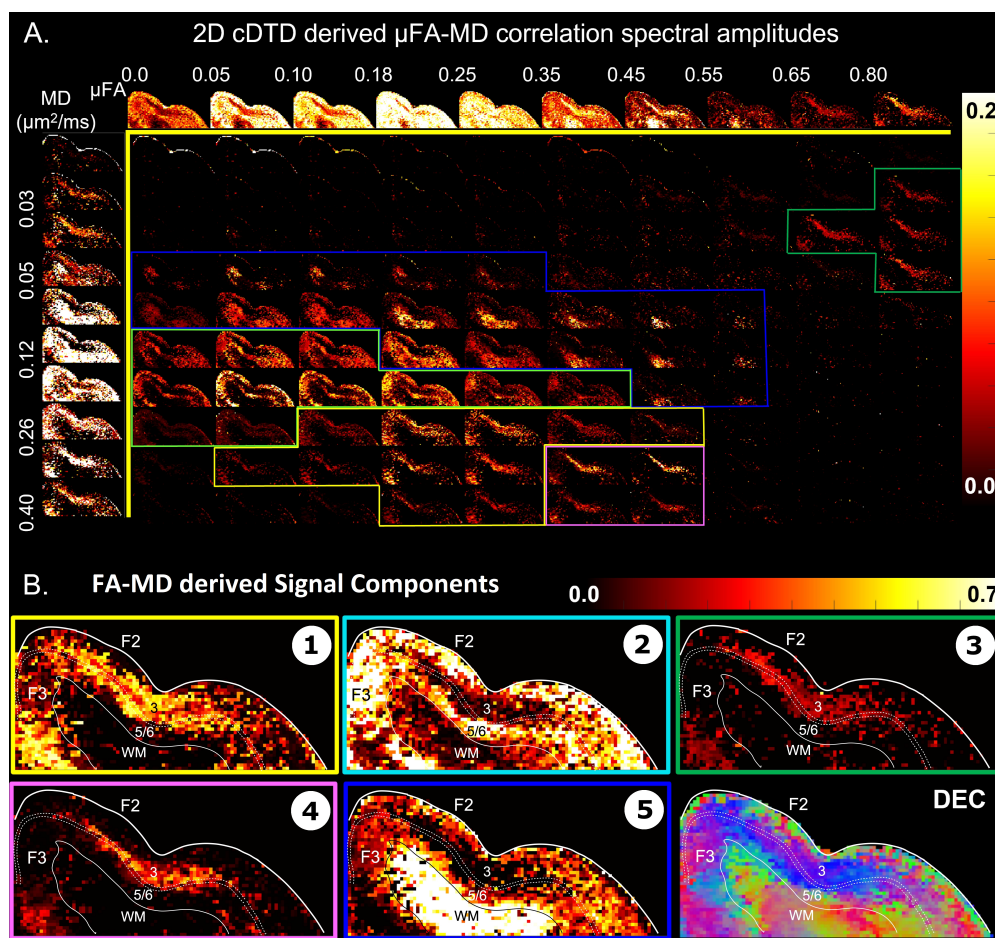

**Figure 7.** **A.** Spectral amplitude maps of normalized 2D  $\mu$ FA – MD correlation spectra in the section of the cortex from **Fig. 6**. **Top row:** Spectral component maps of the normalized 1D marginal distribution of microscopic fractional anisotropy,  $\mu$ FA; **Left column:** Spectral component maps of the normalized 1D marginal distribution of the microscopic diffusion tensor mean diffusivities. **B.** Tissue component maps derived by integrating the 2D  $\mu$ FA – MD distributions over empirically defined spectral regions reveal strong contrast in the mid-cortical areas.
